# Olig2 defines a subset of neural stem cells that produce specific olfactory bulb interneuron subtypes in the subventricular zone of adult mice

Ángela del Águila<sup>1,\*</sup>, Mike Adam<sup>1</sup>, Kristy Ullom<sup>1</sup>, Nicholas Shaw<sup>1,2</sup>, Shenye Qin<sup>1</sup>, Jacqueline Ehrman<sup>1</sup>, Diana Nardini<sup>3</sup>, Joseph Salomone<sup>1</sup>, Brian Gebelein<sup>1</sup>, Q. Richard Lu<sup>3,4</sup>, Steven S. Potter<sup>1,4</sup>, Ronald Waclaw<sup>1,3,4</sup>, Kenneth Campbell<sup>1,4,5</sup> and Masato Nakafuku<sup>1,4,6,‡</sup>

## ABSTRACT

Distinct neural stem cells (NSCs) reside in different regions of the subventricular zone (SVZ) and generate multiple olfactory bulb (OB) interneuron subtypes in the adult brain. However, the molecular mechanisms underlying such NSC heterogeneity remain largely unknown. Here, we show that the basic helix-loop-helix transcription factor Olig2 defines a subset of NSCs in the early postnatal and adult SVZ. Olig2-expressing NSCs exist broadly but are most enriched in the ventral SVZ along the dorsoventral axis complementary to dorsally enriched Gsx2-expressing NSCs. Comparisons of Olig2-expressing NSCs from early embryonic to adult stages using single cell transcriptomics reveal stepwise developmental changes in their cell cycle and metabolic properties. Genetic studies further show that cross-repression contributes to the mutually exclusive expression of Olig2 and Gsx2 in NSCs/progenitors during embryogenesis, but that their expression is regulated independently from each other in adult NSCs. Finally, lineage-tracing and conditional inactivation studies demonstrate that Olig2 plays an important role in the specification of OB interneuron subtypes. Altogether, our study demonstrates that Olig2 defines a unique subset of adult NSCs enriched in the ventral aspect of the adult SVZ.

**KEY WORDS:** Neural stem cell, Adult neurogenesis, Regional identity, Olfactory bulb, Development

## INTRODUCTION

Neural stem cells (NSCs) persist and continuously produce new neurons in a few specialized regions of the adult mammalian brain, including the subventricular zone (SVZ) lining the lateral ventricle (LV) (Nakafuku and Grande, 2020). In these so-called ‘neurogenic

niches’, NSCs remain mostly quiescent or divide infrequently (Götz et al., 2016). These quiescent stem cells (qNSCs) share some features with radial glia in embryos and astrocytes in adults, such as the expression of the intermediate filament protein Nestin and glial high-affinity glutamate transporter GLAST (Pastrana et al., 2009). However, a subset of these qNSCs are mobilized to become activated NSCs (aNSCs) and generate rapidly proliferating secondary progenitors called transient amplifying progenitors (TAPs). These TAPs subsequently differentiate into neuroblasts (NBs) and/or glial cells and migrate to their destinations, such as the olfactory bulb (OB), where they integrate into the existing circuitry.

Recent studies have identified many common regulatory mechanisms between these adult NSCs/progenitors and their embryonic counterparts (Götz et al., 2016; Nakafuku and del Águila, 2020). For example, the homeodomain transcription factor (TF) Gsx2 is expressed in a subset of NSCs/progenitors in both the developing ventral telencephalon and the adult SVZ, and plays an important role in the generation of specific neuronal subtypes in the OB (Toresson et al., 2000; Toresson and Campbell, 2001; Yun et al., 2001, 2003; Waclaw et al., 2009; Wang et al., 2013; Qin et al., 2017; López-Juárez et al., 2013). Likewise, the basic helix-loop-helix (bHLH) TF *Ascl1* is commonly expressed and plays an essential role in neurogenesis in NSCs/progenitors in the embryonic ventral telencephalon and adult SVZ (Torii et al., 1999; Casarosa et al., 1999; Yun et al., 2002; Wang et al., 2009; Andersen et al., 2014).

Another important common feature between embryos and adults is that NSCs/progenitors in different regions are heterogeneous and produce distinct subtypes of neurons (Götz et al., 2016). For example, NSCs/progenitors in different parts of the ventral telencephalon generate distinct subtypes of OB interneurons during embryogenesis (Stenman et al., 2003; Kohwi et al., 2007; Long et al., 2007; Waclaw et al., 2009; Qin et al., 2017). NSCs that reside in distinct subregions of the adult SVZ also produce different OB interneuron subtypes (Young et al., 2007; Merkle et al., 2007, 2014; López-Juárez et al., 2013; Fuentealba et al., 2015; Delgado and Lim, 2015; Lledo and Valley, 2016; Paul et al., 2017). However, the molecular mechanisms underlying such heterogeneity of adult NSCs remain largely unknown.

It is widely known that the bHLH TF Olig2 is expressed in cells in the oligodendrocyte (OL) lineage and plays an essential role in their development (Emery and Lu, 2015). Importantly, Olig2 is also expressed in other neural cell types, including NSCs/progenitors (Takebayashi et al., 2002; Cai et al., 2007; Qin et al., 2017; Chapman et al., 2018). In this study, we show that Olig2 is expressed in a ventrally enriched subset of NSCs in the early postnatal and adult SVZ and plays an important role in the specification of OB interneuron subtypes. Single cell

<sup>1</sup>Division of Developmental Biology, Cincinnati Children’s Hospital Research Foundation, 3333 Burnet Avenue, Cincinnati, OH 45229-3039, USA. <sup>2</sup>Department of Medical Science, University of Cincinnati College of Medicine, 3125 Eden Avenue, Cincinnati, OH 45267-0521, USA. <sup>3</sup>Division of Experimental Hematology and Cancer Biology, Cincinnati Children’s Hospital Research Foundation, 3333 Burnet Avenue, Cincinnati, OH 45229-3039, USA. <sup>4</sup>Department of Pediatrics, University of Cincinnati College of Medicine, 3125 Eden Avenue, Cincinnati, OH 45267-0521, USA. <sup>5</sup>Division of Neurosurgery, Cincinnati Children’s Hospital Research Foundation, 3333 Burnet Avenue, Cincinnati, OH 45229-3039, USA. <sup>6</sup>Department of Neurosurgery, University of Cincinnati College of Medicine, 3125 Eden Avenue, Cincinnati, OH 45267-0521, USA.

\*Present address: Department of Anesthesiology, Duke University Medical Center, 134 Research Dr, Durham, NC 27710, USA.

‡Author for correspondence (masato.nakafuku@cchmc.org)

 M.N., 0000-0001-7783-9005

Handling Editor: James Briscoe  
Received 21 July 2021; Accepted 24 January 2022

transcriptomics and genetic studies also reveal important similarities and differences between Olig2-expressing NSCs/progenitors in the embryonic and postnatal brains.

## RESULTS

### Olig2 is expressed in a ventrally enriched subset of postnatal NSCs

In a search for molecular markers for NSCs, we found that the bHLH TF Olig2 is expressed in the adult SVZ (Fig. 1A-E). Similar to its embryonic expression (Takebayashi et al., 2002; Chapman et al., 2013, 2018), Olig2 expression was found broadly along the dorsoventral (DV) and mediolateral (ML) axes of the LV. However, the density of Olig2<sup>+</sup> cells among total cells in the dorsolateral (dl) SVZ is significantly lower than in other subdomains (Fig. 1F). Moreover, because both the density and total number of cells are much higher in the ventral (v) SVZ than in the lateral (l) and medial (m) SVZ subdomains (for details, see López-Juárez et al., 2013), the actual number of Olig2<sup>+</sup> cells is highest in the vSVZ among the four subdomains examined (Fig. 1F; the locations of distinct SVZ subdomains are indicated in the lower panel of Fig. 1C). By contrast, Gsx2<sup>+</sup> cells were predominantly detected in the dlSVZ. Moreover, although Olig2<sup>+</sup> and Gsx2<sup>+</sup> cells were found in all subdomains, few, if any, cells co-expressing both TFs were found (0 out of 63 Olig2<sup>+</sup> cells in the vSVZ and 0 out of 42 Gsx2<sup>+</sup> cells in the dlSVZ examined) (Fig. 1B-E,G). A similar regionally biased distribution of Olig2<sup>+</sup> and Gsx2<sup>+</sup> cells was also observed in the early postnatal day (P) 16 brain (Fig. 1F). Olig2<sup>+</sup> cells were also detected in the dorsal roof (callosal) region of the SVZ. However, this SVZ subdomain is immediately adjacent to the overlying corpus callosum, where Olig2<sup>+</sup> oligodendrocytes are abundant. Therefore, it is difficult to distinguish Olig2<sup>+</sup> NSCs from Olig2<sup>+</sup> oligodendrocytes in this region. Along the anteroposterior (AP) axis of the LV, both Olig2<sup>+</sup> and Gsx2<sup>+</sup> cells were broadly detected (Fig. 1A-E), although few Olig2<sup>+</sup> cells were detected in the rostral migratory stream (RMS) or the most anterior or posterior portions of the SVZ, whereas a significant number of Gsx2<sup>+</sup> cells occurred in these regions (López-Juárez et al., 2013).

We next examined the cell types that express Olig2 in the NSC lineage. Although only a few Olig2<sup>+</sup> cells were immunopositive for glial fibrillary acidic protein (Gfap) or Dcx, a large fraction of Olig2<sup>+</sup> cells co-expressed the TFs Ascl1 and Dlx2, as well as the proliferation marker Ki67, in the vSVZ of the P16 and adult brain (Fig. 1H-N). Ascl1 is expressed in aNSCs and TAPs and plays an essential role in both the proliferation and neuronal differentiation of NSCs, whereas Dlx2 is mostly expressed in late-stage TAPs and NBs and promotes neurogenesis (Doetsch et al., 2002; Kohwi et al., 2007; Brill et al., 2008; López-Juárez et al., 2013; Andersen et al., 2014) (Fig. 1N). These results collectively support the idea that Olig2 is expressed in aNSCs and TAPs in the vSVZ (Fig. 1N), which is reminiscent of the expression pattern of Gsx2 in the dlSVZ (López-Juárez et al., 2013). Although we detected only a few Olig2<sup>+</sup>/Gfap<sup>+</sup> cells, this might be because of a technical issue given that weak and/or diffuse cytoplasmic signals of Gfap staining in the postnatal SVZ often make it difficult to distinguish individual immunoreactive cells in conventional histology, unlike clear nuclear signals detectable by Ascl1 staining (Pastrana et al., 2009; López-Juárez et al., 2013). Moreover, more than 50% of Ascl1<sup>+</sup> cells in the vSVZ co-expressed Olig2 [55% (72 Ascl1<sup>+</sup>/Olig2<sup>+</sup> cells among 130 Ascl1<sup>+</sup> cells examined) and 62% (120 Ascl1<sup>+</sup>/Olig2<sup>+</sup> cells among 195 Ascl1<sup>+</sup> cells examined) in the adult and P16 brains, respectively], demonstrating that Olig2<sup>+</sup> cells are a predominant population among aNSCs/TAPs in the vSVZ.

### Molecular characterization of Olig2-expressing NSCs by single cell transcriptomics

The aforementioned results demonstrate that Olig2 is expressed in the NSC lineage. However, it is still possible that some of these Olig2<sup>+</sup> cells are OLs newly generated from NSCs. In fact, it has been shown that a small, but significant, number of new OLs are generated by adult NSCs (Hack et al., 2005; Menn et al., 2006; Ortega et al., 2013). Recently, single cell RNA-sequencing (scRNA-seq) analysis has begun to be widely used to reveal molecular properties of postnatal NSCs and their progeny (Dulken et al., 2017; Yuzwa et al., 2017; Zywitzka et al., 2018; Mizrak et al., 2019; Xie et al., 2020; Coré et al., 2020; Cebrian-Silla et al., 2021). To distinguish the expression of Olig2 in NSCs and other cell types, we also performed scRNA-seq analysis of the early postnatal and adult SVZ. A thin strip of tissue around the LV was dissected out from coronal sections of P14 and adult brains, and dissociated single cells were subjected to scRNA-seq using the 10x Genomics platform. From two independent experiments for both stages, transcriptome data with a median of ~3000 genes/cell were obtained from a total of 17,941 and 19,505 cells from the adult and P14 SVZs, respectively. Unsupervised cell clustering was performed by the Louvain algorithm together with dimension reduction using the Python implementation of uniform manifold approximation and projection (UMAP) using the top 18 significant principal components determined by JackStraw plot (Becht et al., 2018). Such clustering identified 17 and 14 distinct cell groups in the adult and P14 cells, respectively, based on their transcriptome signatures (Fig. 2A,B; Table S1). As expected, a large number of Olig2-expressing cells belonged to OL clusters (blue outlines in Fig. 2A,B), including oligodendrocyte progenitor cells (OPCs), pre-oligodendrocytes (Pre-OLs), and mature OLs at both stages (Fig. 2C,E,G,I). By contrast, fewer Gsx2-expressing cells were detected in these OL clusters (Fig. 2D,F,G,I). Moreover, numerous Olig2-expressing cells were detected in the NSC lineage clusters (red outlines in Fig. 2A,B), and their numbers were comparable to those of Gsx2-expressing cells (Fig. 2C-I). For example, 13.9% and 8.0% of cells in the adult NSC lineage expressed Olig2 and Gsx2 transcripts, respectively, whereas 17.1% and 15.9% were Olig2<sup>+</sup> and Gsx2<sup>+</sup>, respectively, in the P14 SVZ (Fig. 2G,I). Furthermore, within the aNSC/TAP cell cluster (clusters 4 and 1 for adult and P14 SVZs, respectively), Olig2<sup>+</sup> and Gsx2<sup>+</sup> cells corresponded to 24.1% and 29.9% in adult animals and 37.2% and 34.1% in P14 animals, respectively. These results reiterate the aforementioned histological finding that both Olig2- and Gsx2-expressing cells are major populations among postnatal NSCs. We also identified the occurrence of Olig2-expressing NSCs in previously reported scRNA-seq datasets (Coré et al., 2020; Cebrian-Silla et al., 2021). Interestingly, approximately one-third of Olig2<sup>+</sup> and Gsx2<sup>+</sup> aNSCs/TAPs co-expressed Olig2 and Gsx2 transcripts (Fig. 2G,I). Such results appear to be contradictory to the aforementioned results that Olig2 and Gsx2 proteins are mostly expressed in distinct cells. However, further analysis demonstrated that cells expressing Olig2 transcripts at high levels contained Gsx2 transcripts mostly at a low level, whereas cells with many Gsx2 transcripts mainly expressed only a few Olig2 transcripts (Fig. 2H,J). Thus, cells with high copy numbers of Olig2 and Gsx2 transcripts were mostly mutually exclusive, similar to the protein expression results. These results suggest that the expression of Olig2 and Gsx2 proteins in NSCs is regulated by both transcriptional and post-transcriptional mechanisms, as demonstrated in previous studies for embryonic NSCs (Shibata et al., 2011; de Chevigny et al., 2012).

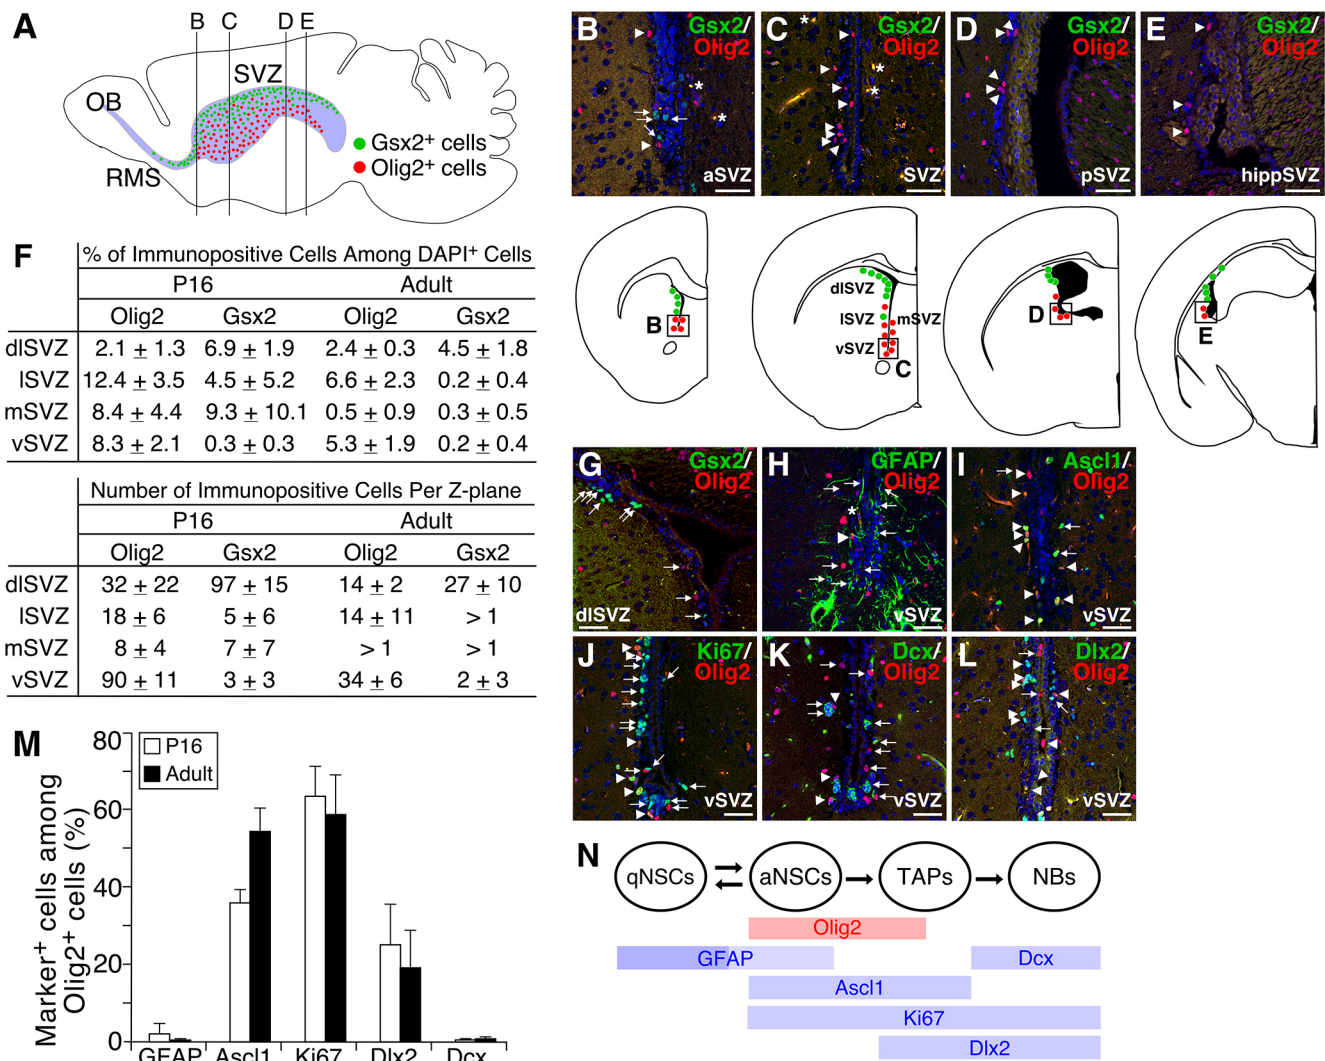

**Fig. 1. Expression of Olig2 in the early postnatal and adult SVZ.** (A-E) The distribution of Olig2<sup>+</sup> (red dots) and Gsx2<sup>+</sup> (green dots) cells in the lateral wall of the LV. Vertical lines indicate the approximate locations of the coronal planes in B-E. (B-E) Representative single z-plane confocal images of the vSVZ (optical resolution of 0.325  $\mu$ m) stained for Olig2 (red, arrowheads) and Gsx2 (green, arrows) at different AP levels (aSVZ, anterior SVZ; SVZ, typical, dorsoventrally elongated SVZ; pSVZ, posterior SVZ adjacent to the hippocampal fissure; HippSVZ, posterior SVZ adjacent to the anterodorsal hippocampus). Asterisks indicate nonspecific fluorescent signals. The anterior and posterior ends of the SVZ exist beyond the regions shown in B and E, respectively. Schematics in B-E show the distribution patterns of Olig2<sup>+</sup> (red dots) and Gsx2<sup>+</sup> (green dots) cells along the LV. Boxes indicate the approximate locations of the photographs in the upper panels. The locations of distinct SVZ subdomains are indicated in the lower panel in C. Olig2<sup>+</sup> and Gsx2<sup>+</sup> cells coexist in the ventral aspect of the aSVZ (B), but not in more posterior SVZs (C-E). (F) Percentage distribution of Olig2<sup>+</sup> and Gsx2<sup>+</sup> cells among total DAPI<sup>+</sup> cells (upper panel) and the number of Olig2<sup>+</sup> and Gsx2<sup>+</sup> cells in a single confocal z-plane (lower panel) in various subdomains of the typical SVZ in the P16 and adult brain (data are mean  $\pm$  s.d.,  $n=3$  for each stage). (G) Mutually exclusive expression of Olig2 (red) and Gsx2 (green, arrows) in the dISVZ. (H-L) Representative images of Olig2<sup>+</sup> cells (red) co-stained for various cell type markers (green) in the vSVZ in the adult brain. Arrowheads and arrows indicate co-expressing and single-positive cells, respectively. (M) The percentages of Olig2<sup>+</sup> cells co-expressing Gfap, Ascl1, Ki67, Dlx2 and Dcx in the vSVZ of adult (filled bars) and P16 (open bars) brains (data are mean  $\pm$  s.d.,  $n=3$ ). (N) Schematic of the expression patterns of Olig2 and other molecular markers in various cell types in the stem cell lineage. Scale bars: 50  $\mu$ m in B-E, G-L.

### Olig2-expressing adult NSCs continuously generate new olfactory bulb neurons

We next examined the fate of Olig2-expressing NSCs in the adult SVZ. We took advantage of the Cre/LoxP lineage-tracing strategy using *Olig2-CreER* mice, in which *CreER* cDNA was knocked into the endogenous *Olig2* locus (Takebayashi et al., 2002). Adult mice carrying *Olig2<sup>CreER/+</sup>; Rosa-tdTomato<sup>+/-</sup>* or *+/+* were treated with the CreER activator tamoxifen (Tx) once daily for 2 and 10 days and analyzed 3 and 56 days after the first Tx treatment, respectively (hereafter, D3 and D56) (Madisen et al., 2010). To detect adult-born neurons, D56 animals also received intraperitoneal injections of 5-

bromo-2'-deoxyuridine (BrdU) twice a day for 5 days 3 weeks prior to histological analysis (from D35 to D39). In these animals, recombined Olig2-expressing NSCs and their progeny were detected as *Rosa-tdTomato*-expressing (tdTomato<sup>+</sup>) cells.

In *Olig2-CreER* mice at D3, all tdTomato<sup>+</sup> cells detected in the SVZ co-expressed Olig2 as expected (62 cells examined in two animals). However, in D56 animals, only approximately a half of tdTomato<sup>+</sup> cells expressed Olig2 in the SVZ (Fig. 3A,G). Thus, a significant fraction of the fate-mapped cells lost Olig2 expression between D3 and D56. Moreover, approximately 8% and 15% of tdTomato<sup>+</sup> cells expressed Ascl1 and Ki67, respectively, at D56,



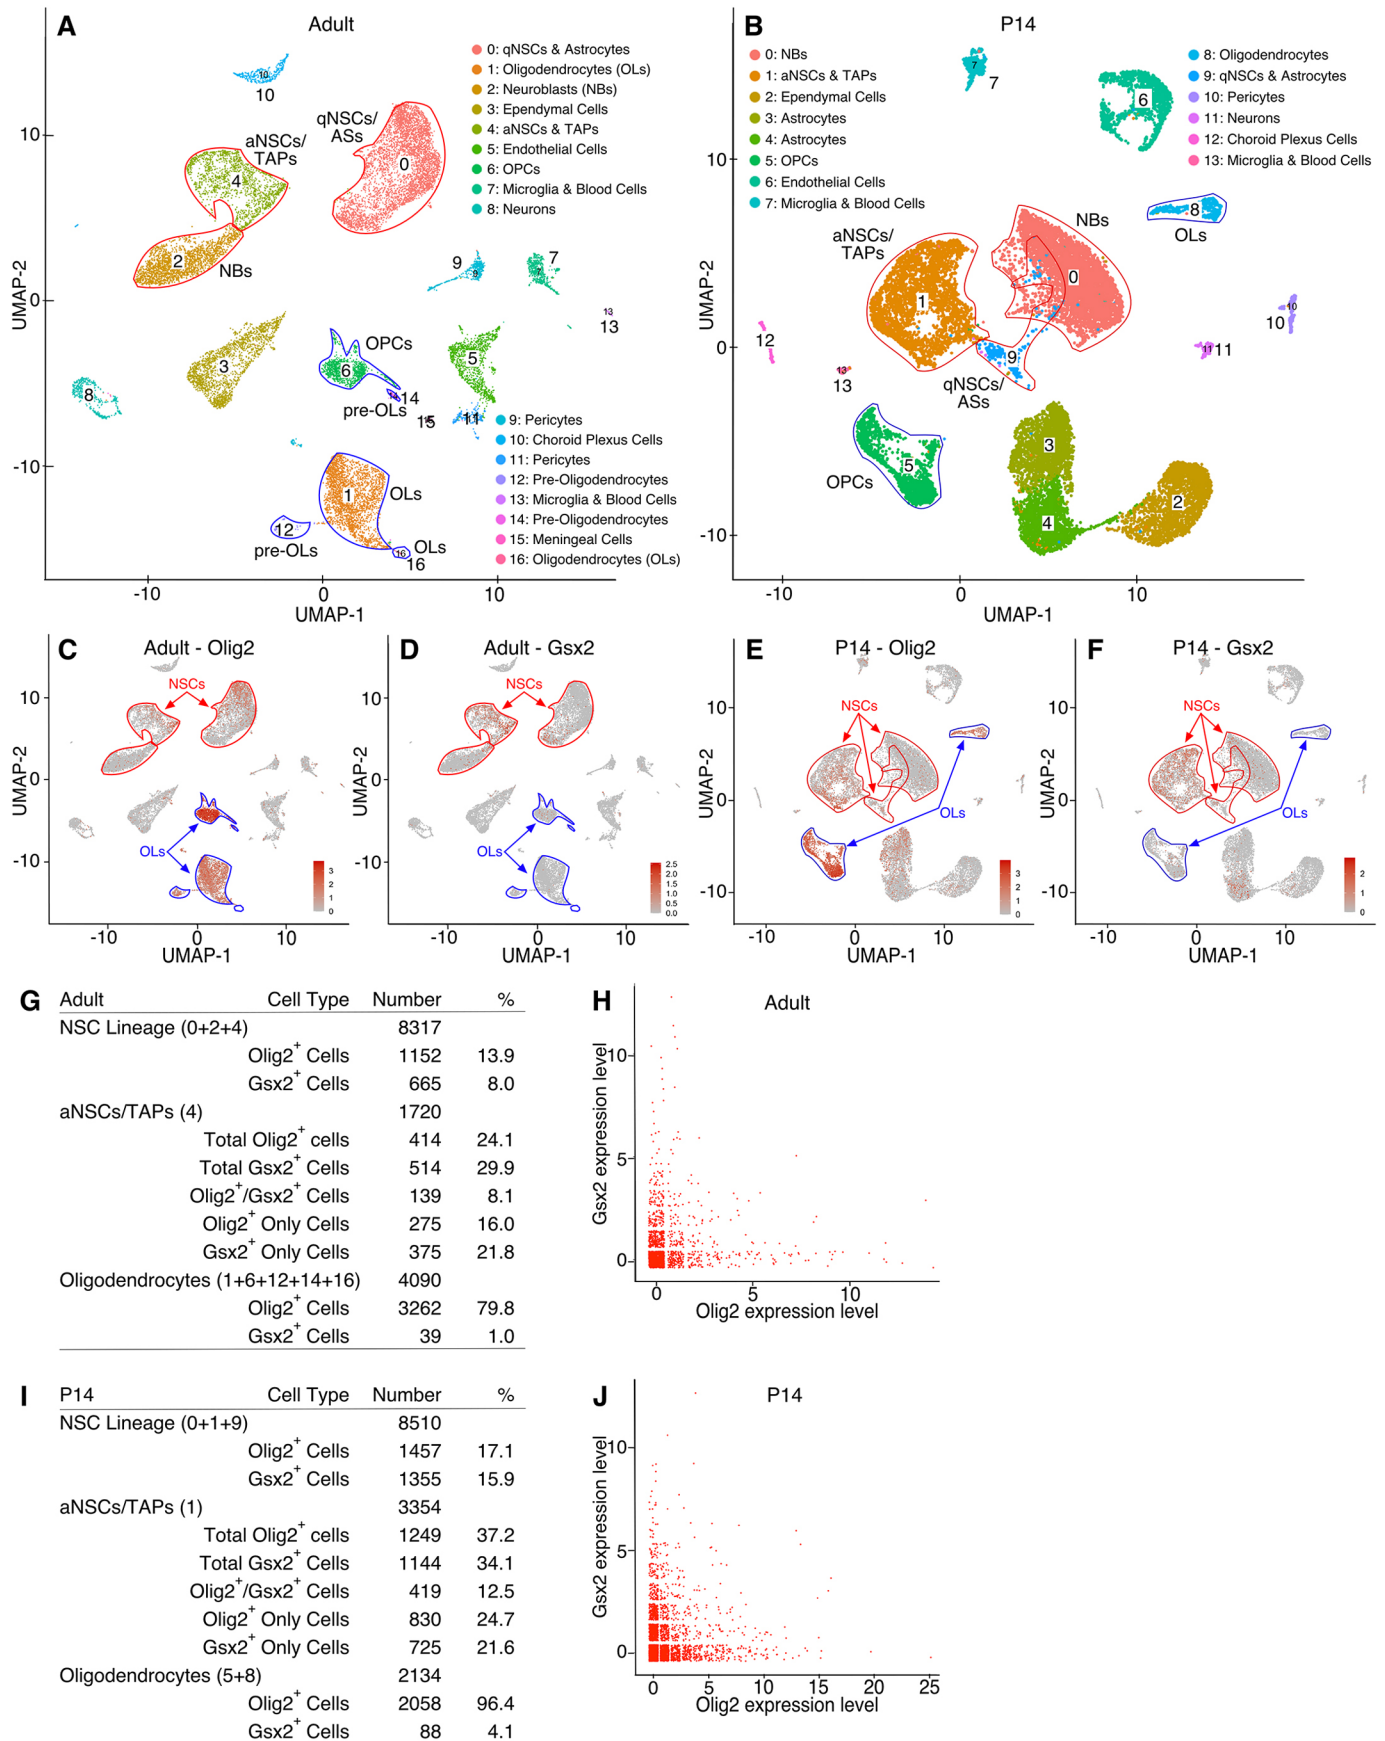

Fig. 2. See next page for legend.



**Fig. 2. scRNA-seq analysis of *Olig2*-expressing NSCs in the adult and P14 brain.** (A,B) UMAP plots of distinct cell types in the SVZ and adjacent regions of the adult (A) and P14 (B) brain. Seventeen and 14 molecularly distinct cell types were identified in adult and P14 tissues, respectively. The cell type of each cluster was identified based on the overall profile of genes with enriched expression (Table S1). Clusters with characteristics of cells in the NSC (clusters 0, 2 and 4 in A, and clusters 0, 1 and 9 in B) and OL lineages (clusters 1, 6, 12, 14 and 16 in A, and clusters 5 and 8 in B) are indicated in red and blue outlines, respectively. (C-F) Feature plots of cells expressing *Olig2* (C,E) and *Gsx2* (D,F) (red dots) among distinct cell clusters in the adult (C,D) and P14 (E,F) brain. Clusters of cells in the NSC and OL lineages are indicated by red and blue outlines, respectively. (G-J) Expression of *Olig2* and *Gsx2* in NSC and OL lineages. (G,I) Numbers of cells expressing *Olig2* and *Gsx2* either alone or in combination in the NSC and OL lineages in adult (G) and P14 (I) brain. (H,J) Dot plots of the relative expression levels of *Olig2* and *Gsx2* transcripts in individual aNSCs/TAPs (clusters 4 and 1 in the adult and P14 SVZs, respectively) (Pearson's correlation coefficient: H,  $-0.85$ ; I,  $-0.84$ ). The number of red dots in each square corresponds to the number of cells in which the indicated normalized copy numbers of *Olig2* and *Gsx2* transcripts were detected.

indicating that tdTomato-labeled *Olig2*<sup>+</sup> NSCs keep proliferating and generating aNSCs and TAPs during this 8-week period (Fig. 3B,C,G). In addition, many tdTomato<sup>+</sup> cells also co-expressed *Dlx2*, *Dcx* and *Pax6*, which mark mainly late TAPs and NBs (Fig. 3D-G) (Kohwi et al., 2005; Brill et al., 2008; de Chevigny et al., 2012). Thus, tdTomato<sup>+</sup> cells derived from *Olig2*<sup>+</sup> cells

include not only NSCs, but also TAPs and NBs, the two major progeny of NSCs in *Olig2-CreER* mice at D56.

We next examined the OB of *Olig2-CreER* mice. Only a few tdTomato<sup>+</sup> cells were detected in D3 mice, and most of these were *Olig2*<sup>+</sup> with typical OL morphology (among more than 60 cells examined). However, we found numerous tdTomato<sup>+</sup> cells, corresponding to  $\sim 4\%$  of all 4',6-diamidino-2-phenylindole (DAPI)<sup>+</sup> cells ( $4.1 \pm 0.5\%$ ,  $n=3$  animals), in the OB of *Olig2-CreER* mice at D56 (Fig. 3H-J). *Olig2* is expressed in OLs and astrocytes but not in neurons in the adult OB (Wang et al., 2021). Consistent with this,  $\sim 40\%$  of tdTomato<sup>+</sup> cells in the OB expressed *Olig2* and *Olig1* (Fig. 3K-K'',L-L'',P). These tdTomato<sup>+</sup> OLs were either pre-existing resident OLs or those that were newly generated by NSCs in the SVZ and had subsequently migrated to the OB (Hack et al., 2005; Menn et al., 2006; Ortega et al., 2013). Importantly, however, we found that  $\sim 60\%$  of tdTomato<sup>+</sup> cells in the OB were negative for *Olig2* or *Olig1* (Fig. 3P). These *Olig2*-negative tdTomato<sup>+</sup> cells were most likely to be newborn neurons generated by *Olig2*<sup>+</sup> NSCs. In fact, we found that  $\sim 40\%$  of tdTomato<sup>+</sup> cells across multiple layers co-expressed *Dlx2* and *NeuN* (Fig. 3M-N'',P). In particular,  $\sim 60\%$  of tdTomato<sup>+</sup> cells in the granule cell layer (GCL) were *Dlx2*<sup>+</sup> and *NeuN*<sup>+</sup> neurons (Fig. 3P). By contrast, because many neurons in the glomerular layer (GL) and plexiform layer (PL: external and internal plexiform layers combined with the mitral cell layer in the middle) remain immuno-negative for *Dlx2* or

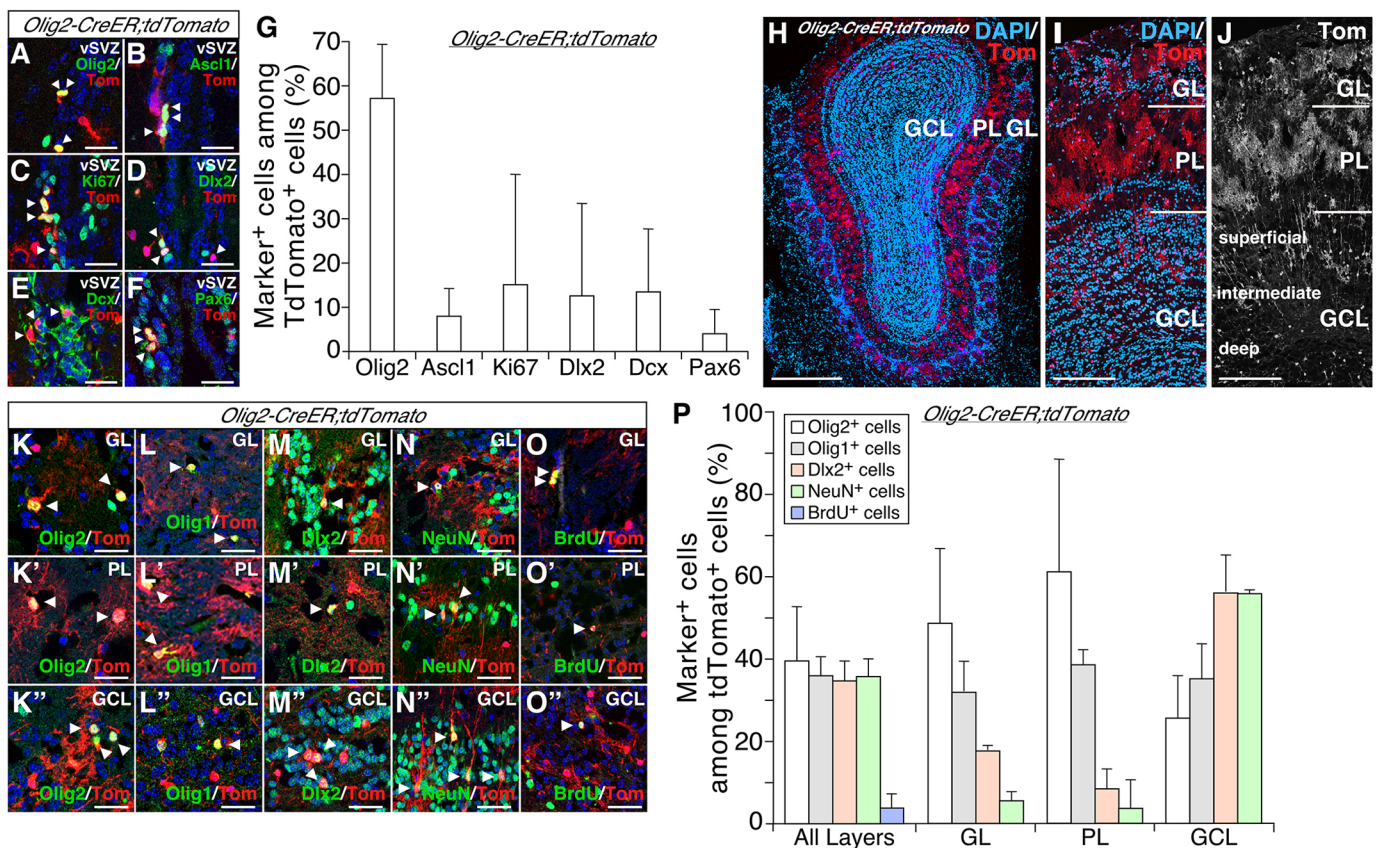

**Fig. 3. Lineage tracing of *Olig2*<sup>+</sup> NSCs and their neuronal progeny in the adult OB.** (A-F) Representative images of tdTomato<sup>+</sup> fate-mapped cells co-expressing various cell type markers in the vSVZ of adult *Olig2-CreER* mice at D56. Co-expressing cells are indicated by arrowheads. (G) Percentages of tdTomato<sup>+</sup> cells co-expressing *Olig2*, *Ascl1*, *Ki67*, *Dlx2*, *Dcx* and *Pax6* in the vSVZ at D56 (data are mean  $\pm$  s.d.,  $n=4$  animals). (H,I) Representative images of tdTomato<sup>+</sup> cells (red; co-stained with DAPI in blue) in a coronal section of the whole OB and a higher magnification view, respectively. (J) Gray-scale image of I without DAPI signals for better visualization of tdTomato<sup>+</sup> cells in various OB layers. (K-O'') Representative images of tdTomato<sup>+</sup> cells (red) co-expressing various markers (green) (indicated by arrowheads) in the GL (K-O), PL (K'-O'), and GCL (K''-O''). (P) Percentages of tdTomato<sup>+</sup> fate-mapped cells co-expressing various markers in different OB layers at D56 (data are mean  $\pm$  s.d.,  $n=3$ ). Scale bars: 25  $\mu$ m in A-F,K-O''; 500  $\mu$ m in H; 200  $\mu$ m in I,J.

NeuN even at mature stages (Parrish-Aungst et al., 2007; Long et al., 2007), the percent overlaps between tdTomato and these neuronal markers in these layers were lower than in the GCL (Fig. 3P). Moreover, a small but significant fraction of tdTomato<sup>+</sup> cells became BrdU<sup>+</sup> 3 weeks after the animals received BrdU (Fig. 3O-O',P). Together, these results demonstrate that Olig2-expressing NSCs at the adult stage generate new neurons that migrate to the OB.

### Olig2<sup>+</sup> NSCs generate multiple subtypes of neuron in the adult OB

We next examined the subtype identity of neurons generated by Olig2<sup>+</sup> NSCs. After excluding Olig2<sup>+</sup> OLs from the total tdTomato<sup>+</sup> cells, ~60% of *Olig2-CreER* fate-mapped cells belonged to the GCL, whereas 30% and 10% were detected in the GL and PL, respectively (Fig. 4A). Thus, Olig2<sup>+</sup> NSCs generate new neurons in multiple layers of the OB. In the GCL, neurons expressing calretinin (CR), neurocalcin (NC), calbindin (CB), tyrosine hydroxylase (TH) and parvalbumin (PV) represent discrete interneuron populations, except for a partial overlap of CR<sup>+</sup> (~15%) and PV<sup>+</sup> (~20%) cells with NC<sup>+</sup> cells (Briñón et al., 1999; Parrish-Aungst et al., 2007). We

found that significant fractions of tdTomato<sup>+</sup> cells in the GL expressed CR, NC and TH, but no tdTomato<sup>+</sup> cells were CB<sup>+</sup> or PV<sup>+</sup> (Fig. 4B-F,K). A small fraction of tdTomato<sup>+</sup> cells in the PL and GCL also co-expressed CR (Fig. 4G,J,K). Given that adult-born OB neurons require a long time period (6-8 weeks) after their birth to express mature subtype markers fully (Kohwi et al., 2007), it is likely that more tdTomato<sup>+</sup> cells would express subtype-specific markers if analyzed at later time points. In fact, ~40% of tdTomato<sup>+</sup> cells expressed the homeodomain TF Pax6 in the GL and GCL, and ~25% express the MADS box TF Mef2c in the GCL (Fig. 4H,I,L) (Lyons et al., 1995; Hack et al., 2005; Kohwi et al., 2005; Brill et al., 2008). These results demonstrate that Olig2<sup>+</sup> NSCs generate multiple neuronal subtypes across all layers in the adult OB.

### Developmental changes in the molecular properties of Olig2-expressing NSCs/progenitors

The aforementioned results demonstrated that Olig2-expressing NSCs in the adult SVZ generate new OB neurons. Previous studies have also shown that Olig2<sup>+</sup> NSCs/progenitors continuously produce new neurons and glia from early to late embryonic stages

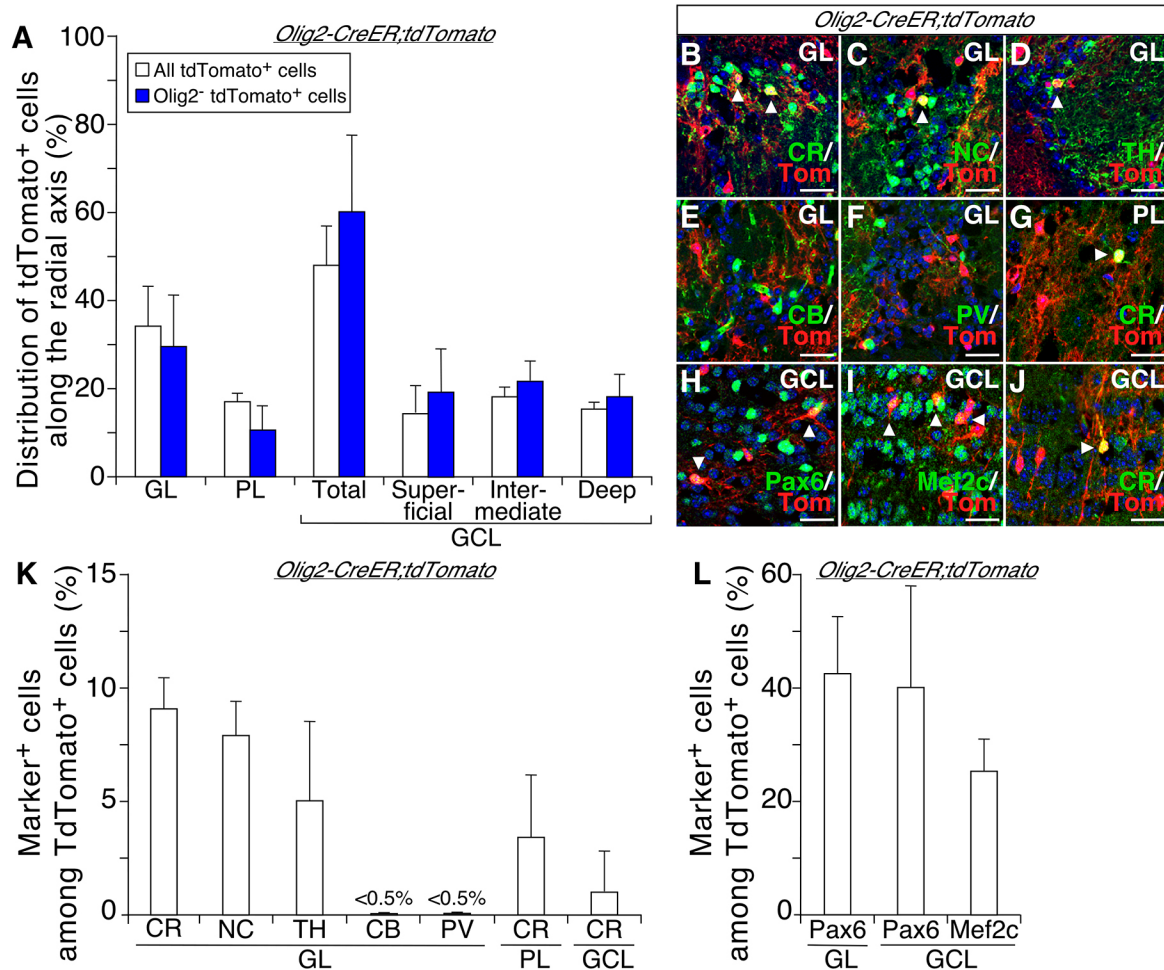

**Fig. 4. Olig2<sup>+</sup> NSCs generate a variety of neuronal subtypes in the adult OB.** (A) Laminar distribution pattern of tdTomato<sup>+</sup> cells at D56 showing the percentages of tdTomato<sup>+</sup> cells in the GL, PL and the whole GCL, as well as the superficial, intermediate and deep sublayers of the GCL in adult *Olig2-CreER* mice at D56. Open bars represent data on all tdTomato<sup>+</sup> cells, whereas blue bars represent data on tdTomato<sup>+</sup> cells excluding Olig2<sup>+</sup> OLs, which correspond to Olig2<sup>+</sup> NSC-derived new neurons (data are mean±s.d., n=3). (B-J) Representative images of tdTomato<sup>+</sup> cells (red) co-expressing respective markers (arrowheads) in the GL (B-F), PL (G) and GCL (H-J) of the OB in *Olig2-CreER* mice at D56. (K,L) Percentages of tdTomato<sup>+</sup> cells co-expressing various neuronal subtype markers (K) and TFs (L) at D56. The layers and neuronal subtype markers examined are detailed below the x-axis (data are mean±s.d., n=3). Scale bars: 25 μm in B-J.



(Miyoshi et al., 2007; Ono et al., 2008). Thus, we next sought to interrogate how the molecular properties of Olig2<sup>+</sup> NSCs/progenitors change over time by comparing their transcriptome profiles. We obtained scRNA-seq data on the whole ventral telencephalon at embryonic day (E) 12.5 and E18.5 using the 10x Genomics platform and compared these datasets with those from P14 and adult SVZ. First, cells that belonged to NSC/progenitor clusters (qNSC/astrocyte and aNSC/TAP) at each stage were identified based on their transcriptome profiles, and Olig2-expressing cells within these clusters were isolated (Fig. S1 and Table S1). Subsequently, these cells were combined and subjected to reclustering using UMAP plots. In these plots, the physical distance between individual cells reflects the extent of the similarity of their transcriptome profiles, unlike conventional tSNE analysis, so that one can visualize the overall similarities and differences between cells at different stages (Becht et al., 2018). Such an analysis revealed that Olig2<sup>+</sup> NSCs/progenitors at different stages as a whole exhibited clearly distinct transcriptome profiles (Fig. 5A-C; Table S2) and were divided into partially overlapping, but clearly distinct, subclusters (Fig. 5D,E; Table S3). For example, Olig2<sup>+</sup> NSCs/progenitors at E12.5 and E18.5 (green and blue dots, respectively, in Fig. 5A,B) were divided into four (0, 1, 3 and 5) and three (3, 4 and 7) distinct subclusters, respectively (compare Fig. 5D with Fig. 5A,B) (Haubensak et al., 2004; Noctor et al., 2004; Fish et al., 2008; Wilsch-Bräuninger et al., 2016). Among these subclusters, subcluster 3 was the only population shared between E12.5 and E18.5 (Fig. 5D). Transcriptome profiling further indicated that cells in subcluster 7 showed enriched expression of many genes related to glial progenitors and immature astrocytes, such as vimentin (*Vim*), solute carrier family 1 member 3 (*Slc1a3* or GLAST), fatty acid-binding protein 7 (*Fabp7* or *Bbbp*) and aldehyde dehydrogenase 1 family member L1 (*Aldh1l1*) (Fig. 5E; Table S3). The occurrence of these unique cells at E18.5 is consistent with the fact that Olig2<sup>+</sup> progenitors at late embryonic stages generate not only neurons, but also astrocytes and OLs (Miyoshi et al., 2007; Ono et al., 2008). Moreover, the majority of cells remaining at E18.5 formed subcluster 4, which showed enriched expression of genes related to basal progenitors, such as *Ascl1*, *Dlx1/2*, and *Sox4*, but their overall transcriptome profile was clearly distinguishable from the basal progenitor subcluster at E12.5 (subcluster 3) (Fig. 5D,E). Thus, the properties of Olig2<sup>+</sup> progenitors at E18.5 are molecularly distinct from those at E12.5.

Clusters of postnatal Olig2<sup>+</sup> cells also partially overlapped with E18.5 cells, but the majority belonged to discrete clusters with very different transcriptome profiles (Fig. 5A-C). The majority of P14 cells belonged to a single cluster (subcluster 2 in Fig. 5D), and their transcriptome signature was reminiscent of the properties of aNSCs and TAPs (Fig. 5E; Table S3). This gene expression signature of P14 cells reflects a higher neurogenic activity of NSCs at early postnatal stages than during the adult stage (Batista-Brito et al., 2008; Sakamoto et al., 2014). By contrast, a significant fraction of cells at the adult stage formed a unique cluster (subcluster 6 in Fig. 5D), characterized by the enriched expression of genes related to qNSCs and astrocytes, such as retinoid-related orphan receptor beta (*Rorb*), solute carrier family 1 member 2 (*Slc1a2* or *Eaat2*) and gap junction protein alpha 1 (*Gja1*) (Fig. 5E; Table S3). The occurrence of this adult-specific subcluster is consistent with the fact that, while NSCs mature postnatally, their neurogenic activity gradually declines, and the majority become quiescent or divide only slowly (Götz et al., 2016).

The cell cycle profile also revealed distinct properties of Olig2<sup>+</sup> NSCs/progenitors at different stages. Based on the relative

expression levels of a set of cell cycle phase-specific genes (Table S4), individual cells could be divided into three groups: cells in the G0/G1, S and G2/M phases (Fig. 5F,G). This analysis demonstrates that more than 90% of Olig2<sup>+</sup> NSCs/progenitors at E12.5 were either in the S or G2/M phase (Fig. 5G), and that the transcriptome profile of cells in the G0/G1 phase (red dots) more closely resembles cells in the S phase (blue dots) than those in the G2/M phase (green dots) (Fig. 5F). By contrast, among Olig2<sup>+</sup> NSCs/progenitors at E18.5, there were fewer cells in the S phase, and ~35% of cells were in the G0/G1 phase (Fig. 5G). These G0/G1 phase cells were mostly found in the cluster of glial progenitors/immature astrocytes (subcluster 7), reflecting active gliogenesis at late embryonic stages (compare Fig. 5D with Fig. 5F). Postnatally, cells in the G0/G1 phase further increased and reached 72% at the adult stage (Fig. 5G). Moreover, subcluster 2, which corresponds to aNSCs/TAPs in the P14 and adult SVZ, is a mixture of cells in all phases of the cell cycle, whereas subcluster 6, which contains adult qNSCs and astrocytes, mainly comprised cells in the G0/G1 phase (Fig. 5F). These results clearly demonstrate a stage-dependent stepwise decline in overall proliferative activity during the postnatal development of NSCs.

Comparisons of transcriptome profiles related to various metabolic and signaling pathways by ReactomeGSA also revealed significant stage-dependent changes (<https://reactome.org>; Griss et al., 2020). A gene set variation analysis (GSVA) of genes associated with specific metabolic and signaling pathways was performed using datasets from all four stages, and the relative activity of each pathway was scored and compared as described in a previous study (Hänzelmann et al., 2013) (for details, see Materials and Methods and Table S5). We found that the activity of many pathways increased over time from E12.5 to adult stages, but the timing of their increase varied significantly. For example, the activity of the signaling pathways for the neurotrophin receptors TrkA and TrkB was low in cells at E12.5 but showed gradual increases from E18.5 to the adult stage (blue font in Fig. 5H). By contrast, the activity of various lipid metabolism and neurotransmission/ion transport-related pathways (red and green fonts, respectively, in Fig. 5H) remained very low during embryogenesis, but those pathways became significantly active at P14 and reached higher levels at the adult stage. These changes probably reflect that NSCs/progenitors at postnatal stages gradually acquire responsiveness to various local and systemic environmental cues (Nakafuku and Grande, 2020). Altogether, these results demonstrate that the properties of Olig2<sup>+</sup> NSCs/progenitors markedly change over time from early embryonic to adult stages.

### Crosstalk between Olig2 and Gsx2 in embryonic and adult NSCs/progenitors

In the developing telencephalon, both Olig2 and Gsx2 are expressed in broad progenitor domains, including the lateral ganglionic eminence (LGE), medial ganglionic eminence (MGE), preoptic area (POA) and septum (Toresson et al., 2000; Toresson and Campbell, 2001; Yun et al., 2001, 2003; Takebayashi et al., 2002; Petryniak et al., 2007; Wang et al., 2013; Chapman et al., 2013, 2018). In particular, Gsx2 expression is initially broad and uniform at early stages (E9.5-E11.5), but subsequently becomes refined to a high dorsal-low ventral gradient within the LGE from E12.5 onward (Stenman et al., 2003; Waclaw et al., 2009). Thus, the Gsx2-high and Olig2-high progenitor domains become mostly complementary to each other at late embryonic stages (Chapman et al., 2018). Such complementary patterns are reminiscent of their expression in the postnatal SVZ described above.



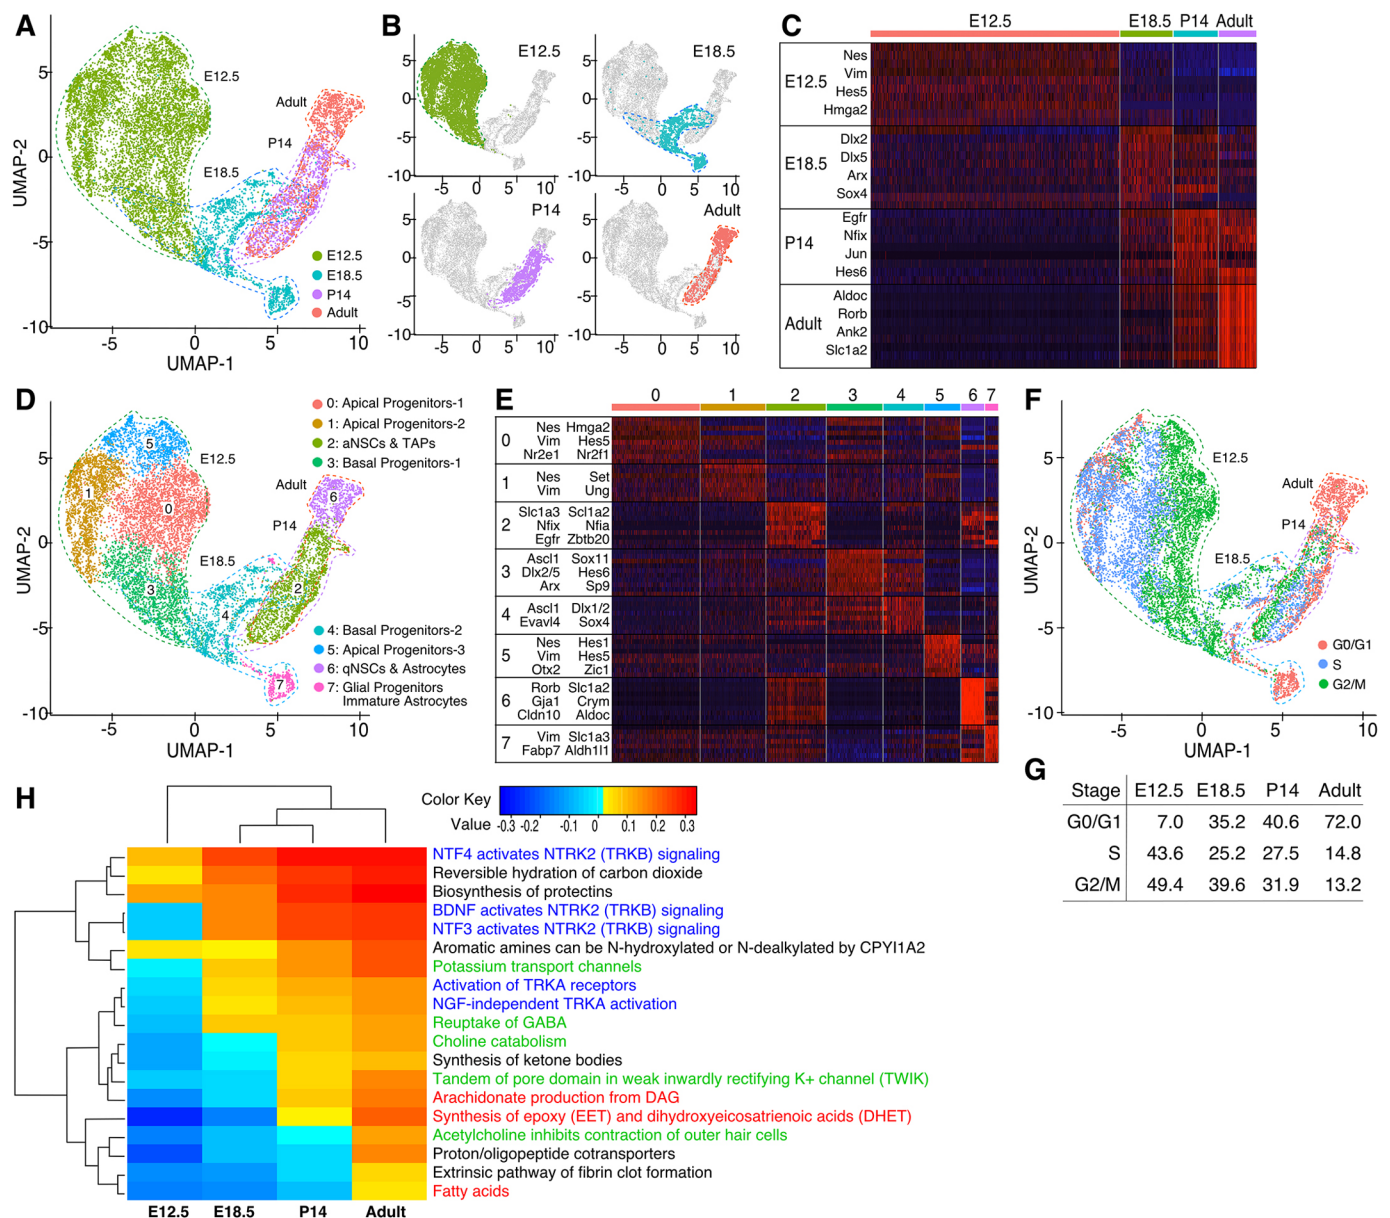

**Fig. 5. Developmental changes in the molecular properties of Olig2+ NSCs revealed by scRNA-seq.** (A,B) UMAP clustering of Olig2+ NSCs/progenitors from different developmental stages. Cells from E12.5 (green dots), E18.5 (blue dots), P14 (purple dots) and adult (orange dots) stages were combined and reclustered to visualize their similarities and differences. (A) Cells from all stages combined; (B) cells at each stage shown separately by overlaying on top of all cells (gray dots). (C) Heatmap visualization of distinct transcriptome profiles of Olig2+ NSCs/progenitors at different stages. The relative expression levels of enriched genes (top ten genes for E12.5, E18.5 and adult stages, and top nine genes for P14) in cells at each stage (shown at the top) are compared, and representative genes are listed in the left column (Table S2). (D) UMAP clustering of Olig2+ NSCs/progenitors from all four stages into eight distinct subclusters. Each subcluster in D is named based on the similarity of its overall transcriptome profile with known progenitor subtypes. (E) Heatmap of the relative expression levels of eight to ten enriched genes in each subcluster (shown at the top); representative genes in each subcluster are listed in the left column (Table S3). (F,G) Cell cycle profiles of Olig2+ NSCs/progenitors at different stages. (F) Feature plot of cells in distinct cell cycle phases among subclusters of Olig2+ NSCs/progenitors. (G) Percentages of cells in the G0/G1 (orange dots), S (blue dots) and G2/M (green dots) phases among total cells at each stage. For the list of genes enriched in S and G2/M phases, see Table S4. (H) Heatmap comparison of the activity of various molecular pathways in Olig2+ NSCs/progenitors at different stages. The top 19 molecular pathways that showed the largest differences in activity level among cells at different stages are compared. Pathways related to neurotrophin signaling, lipid metabolism and neurotransmission/ion transport are highlighted in blue, red and green font, respectively.

Importantly, our recent study demonstrated that the dorsal limit of Olig2 expression in the developing LGE expands in *Gsx2* mutant embryos (Chapman et al., 2018). Thus, cross-repression between Olig2 and *Gsx2* may play an important role in establishing and/or maintaining their mutual expression patterns. To address this possibility, we compared the expression of Olig2 and *Gsx2* in both *Gsx2* and *Olig2* germline mutant embryos at E15.5. In control

embryos, the ventral limit of *Gsx2*-high expression was confined to the dLGE (Fig. 6A, arrow), whereas the dorsal limit of Olig2 expression remained in the ventral half of the vLGE (Fig. 6A, arrowhead). By contrast, *Gsx2*-high expression expanded far ventrally and reached the MGE in *Olig2* knockout (KO) embryos (Fig. 6B, arrow). Conversely, in *Gsx2* KO embryos, the dorsal limit of Olig2 expression expanded dorsally and reached the ventral limit

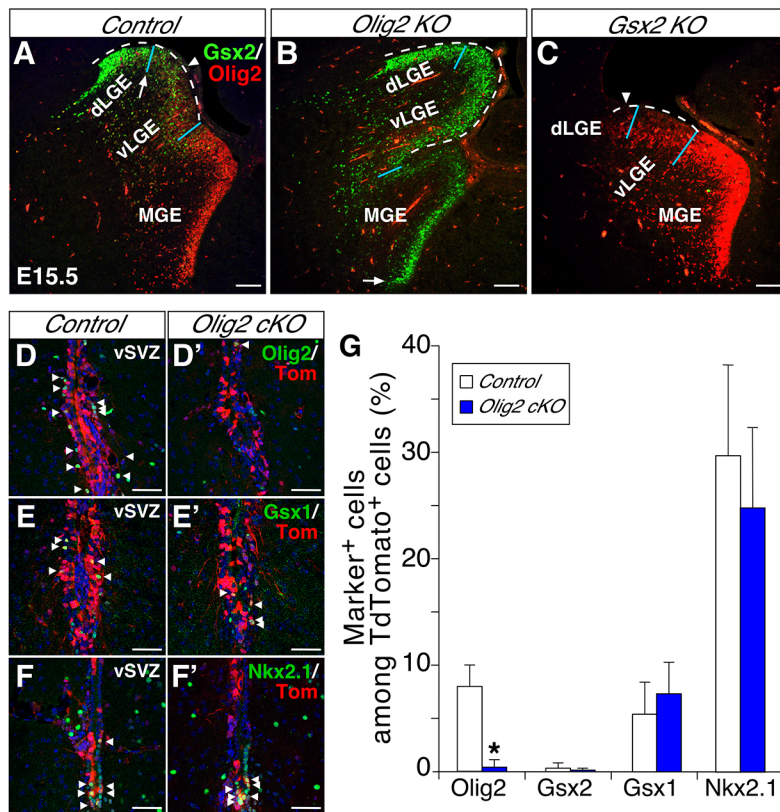

**Fig. 6. Cross-repression between *Olig2* and *Gsx2* in embryonic and adult brains.** (A–C) Expression of *Olig2* (red) and *Gsx2* (green) proteins in progenitor domains of the ventral telencephalon in control (A), *Olig2* KO (B) and *Gsx2* KO (C) embryos at E15.5. Dashed-white lines indicate the ventricular surface of the LGE, and short blue lines indicate the borders between the dLGE, vLGE and MGE. Arrowheads indicate the dorsal limit of *Olig2* expression, whereas arrows indicate the ventral limit of *Gsx2*-high expression. Similar phenotypes were observed in more than three embryos examined for each genotype. (D–G) Impact of conditional inactivation of *Olig2* on the region-selective expression of *Olig2*, *Gsx2*, *Gsx1* and *Nkx2.1* in adult NSCs. (D–F) Representative images of tdTomato<sup>+</sup> cells co-expressing the regional identity markers *Olig2*, *Gsx1* and *Nkx2.1* (arrowheads) in the vSVZ of control and *Olig2* cKO mice at D28. (G) Percentages of tdTomato<sup>+</sup> cells co-expressing various TFs in the vSVZ of control and *Olig2* cKO mice at D28 (data are mean±s.d.,  $n=5$  for control and  $n=4$  for cKO animals). For quantification of *Nkx2.1* cells, sections slightly posterior to those for the standard SVZ analysis were used. \* $P<0.05$  compared with control animals (Student's and Welch's  $t$ -tests for parametric and nonparametric data, respectively). Scale bars: 50  $\mu$ m in A–F'.

of the dLGE (Fig. 6C, arrowhead), where both the dLGE and vLGE were markedly reduced in size as a result of *Gsx2* loss (compare dashed lines in Fig. 6A with those in Fig. 6C) (Toresson et al., 2000; Yun et al., 2001). These results demonstrate that *Gsx2* limits the expression of *Olig2* dorsally, whereas *Olig2* limits the high expression of *Gsx2* ventrally in embryonic NSCs/progenitors. Whether such mutual cross-repression is attributable to direct transcriptional repression remains to be investigated.

Given that these germline mutant animals die at birth (Toresson et al., 2000; Dessaud et al., 2007), we next used the CreER-loxP system for the conditional inactivation of these genes in adult NSCs. We generated mice homozygous for a floxed allele of *Olig2* (*Olig2*<sup>lox/lox</sup>) (Yue et al., 2006; Cai et al., 2007) and heterozygous for a *GLAST-CreER* knock-in allele (Mori et al., 2006). The latter contained a CreER transgene expressed from the locus of the glutamate transporter gene *GLAST* so that we were able to evaluate the impact of *Olig2* inactivation in the most primitive/undifferentiated *GLAST*<sup>+</sup> NSCs. *Olig2* conditional knockout (cKO) (*Olig2*<sup>lox/lox</sup>;*GLAST-CreER*<sup>+/-</sup>;*Rosa-tdTomato*<sup>+/-</sup> or <sup>+/+</sup>) and their littermate control (*Olig2*<sup>lox/+</sup> or <sup>+/+</sup>;*GLAST-CreER*<sup>+/-</sup>;*Rosa-tdTomato*<sup>+/-</sup> or <sup>+/+</sup>) mice were treated with Tx at the age of 10–12 weeks, and subsequently analyzed at D28. As expected, the percentage of *Olig2*<sup>+</sup> cells among tdTomato<sup>+</sup> recombined cells decreased by more than 90% in the vSVZ of *Olig2* cKO mice compared with control animals (Fig. 6D,D',G). However, in these mice, the dorsally restricted expression pattern of *Gsx2* did not significantly change, and the percentages of *Gsx2*<sup>+</sup> cells among tdTomato<sup>+</sup> cells in the vSVZ remained very low (Fig. 6G). Two other homeodomain TFs, *Nkx2.1* and *Gsx1*, are also expressed in a subset of NSCs in the vSVZ (López-Juárez et al., 2013; Merkle et al., 2014; Paul et al., 2017). The ventrally enriched expression of these TFs among tdTomato<sup>+</sup> cells did not significantly change either (Fig. 6E–G). Thus, the inactivation of *Olig2* does not alter the

region-specific expression patterns of either *Gsx2* or other NSC identity genes. We also previously reported that *Olig2* expression in the dISVZ is not significantly affected by conditional inactivation of *Gsx2* in adult NSCs (López-Juárez et al., 2013). Thus, unlike in embryos, cross-repression between *Olig2* and *Gsx2* does not play a major role in maintaining their region-selective expression patterns in NSCs in the adult stage.

#### Impact of conditional inactivation of *Olig2* in NSCs on neurogenesis and neuronal subtype specification

The aforementioned immunohistochemical and scRNA-seq analyses demonstrated that *Olig2*<sup>+</sup> cells are a predominant (>50%) NSC population in the vSVZ of the adult brain (Fig. 1M and Fig. 2G). Thus, *GLAST-CreER*-based *Olig2* cKO mice allowed us to examine the role of *Olig2* in neuronal differentiation of NSCs in the vSVZ. In fact, only a small fraction of tdTomato<sup>+</sup> cells expressed *Olig2*<sup>+</sup>, whereas many tdTomato<sup>+</sup> cells became *Dcx*<sup>+</sup> and *Pax6*<sup>+</sup> NBs in these *Olig2* cKO mice at D28 (Fig. 6G and Fig. 7D–F). Interestingly, the percentages of *Ascl1*<sup>+</sup> aNSCs/TAPs and *Ki67*<sup>+</sup> proliferative cells among tdTomato<sup>+</sup> cells were modestly but significantly increased at D28 compared with control animals (1.4- and 1.2-fold for *Ascl1* and *Ki67*, respectively), suggesting that activation and/or proliferation of NSCs/TAPs are moderately stimulated by the loss of *Olig2* (Fig. 7B,B',C,C',F). Nevertheless, *Dcx*<sup>+</sup>/tdTomato<sup>+</sup> and *Pax6*<sup>+</sup>/tdTomato<sup>+</sup> NBs were detected at comparable levels in *Olig2* cKO and control mice, demonstrating that *Olig2* inactivation does not significantly affect neuronal output from adult NSCs (Fig. 7D–F). Thus, certain feedback mechanisms may operate to maintain a steady level of NB production despite a slight increase in the activation and/or proliferation of NSCs/TAPs. Moreover, *Gfap*<sup>+</sup>/tdTomato<sup>+</sup> cells also remained unchanged between *Olig2* cKO and control mice, suggesting that *Gfap*<sup>+</sup> stem cells are maintained in *Olig2* cKO mice (Fig. 7A,A',F). Together,



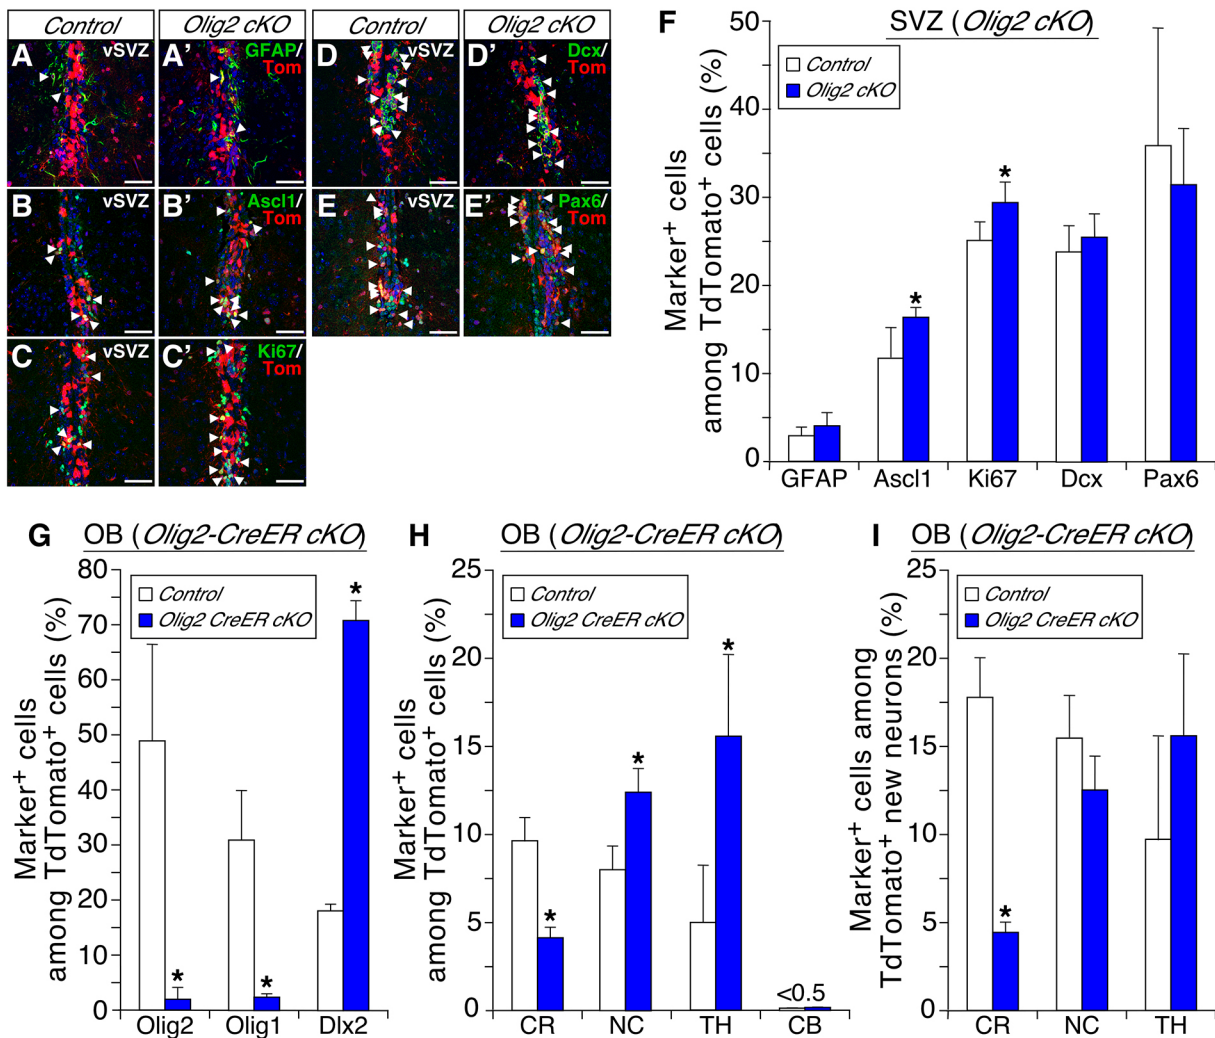

**Fig. 7. Impact of conditional inactivation of *Olig2* in adult NSCs on neurogenesis and neuronal subtype specification.** (A-E') Representative images of tdTomato<sup>+</sup> cells (red) co-expressing various NSC lineage markers (arrowheads) in the vSVZ of control and *Olig2* cKO mice at D28. (F) Percentages of tdTomato<sup>+</sup> cells co-expressing Gfap, Ascl1, Ki67, Dcx, and Pax6 in the vSVZ of control and *GLAST-CreER*-based *Olig2* cKO mice at D28 (data are mean±s.d., *n*=5 for control and *n*=4 for cKO animals). (G-I) Percentages of tdTomato<sup>+</sup> cells co-expressing Olig2, Olig1 and Dlx2 (G) and various neuronal subtype markers (H,I) in the GL of the OB in control and *Olig2-CreER*-based *Olig2-CreER* cKO mice at D56 (data are mean±s.d., *n*=3). (I) Normalized percentage of cells expressing CR, NC and TH among newborn neurons derived from *Olig2*<sup>+</sup> NSCs (i.e. *Olig2*-negative tdTomato<sup>+</sup> cells). \**P* < 0.05 compared with control animals (Student's and Welch's *t*-tests for parametric and nonparametric data, respectively). Scale bars: 50 μm in A-E'.

these results demonstrate that *Olig2* is dispensable for neurogenesis in adult NSCs.

In these *GLAST-CreER*-based *Olig2* cKO mice, gene recombination and subsequent lineage tracing occurred not only in *Olig2*<sup>+</sup> NSCs, but also in other NSCs, such that tdTomato<sup>+</sup> fate-mapped cells derive from heterogeneous NSC populations. Therefore, they are not suitable for examining the impact of *Olig2* inactivation on the specificity of neuronal subtypes. For this purpose, we next used *Olig2<sup>CreER/flox</sup>; Rosa-tdTomato<sup>+/-</sup>* or *+/+* (*Olig2-CreER* cKO) mice, in which *Olig2* is inactivated selectively in *Olig2*<sup>+</sup> NSCs. As expected, the percentage of *Olig2*<sup>+</sup> cells among tdTomato<sup>+</sup> cells was markedly reduced (by more than 95%) in the GL of the OB in *Olig2-CreER* cKO mice compared with control at D56 (Fig. 7G). In parallel, *Olig1*<sup>+</sup> OLs were markedly reduced among tdTomato<sup>+</sup> cells and, conversely, *Dlx2*<sup>+</sup> neurons were dramatically increased and comprised more than 70% of all tdTomato<sup>+</sup> cells in the mutant OB (Fig. 7G). Thus, inactivation of *Olig2* resulted in a loss of OLs among tdTomato<sup>+</sup> cells, and the

majority of tdTomato<sup>+</sup> cells remaining became neurons in the mutant GL (97.8±2.2% in *Olig2-CreER* cKO mice compared with 51.3±18.2% in control mice, *n*=3). This loss of OLs could be because *Olig2* is required for the survival of existing OLs and/or production of new OLs from NSCs.

Importantly, among these remaining tdTomato<sup>+</sup> cells in *Olig2-CreER* cKO mice, the percentage of CR<sup>+</sup> neurons was reduced by half compared with control animals (Fig. 7H). Furthermore, given that the proportion of new neurons among tdTomato<sup>+</sup> cells was doubled in *Olig2* mutants compared with control animals, the percentage of CR<sup>+</sup> neurons among new neurons needs to be normalized based on the percentage of *Olig2*-negative cells among all tdTomato<sup>+</sup> cells. Comparison of these normalized values demonstrated that the actual extent of the reduction in CR<sup>+</sup> neurons among *Olig2*<sup>+</sup> NSC-derived new neurons (*Olig2*-negative tdTomato<sup>+</sup> cells) was even more drastic (approximately a quarter of the control level) (Fig. 7I). By contrast, although the percentages of NC<sup>+</sup> and TH<sup>+</sup> cells among all tdTomato<sup>+</sup> cells were increased in the



mutants (Fig. 7H), their normalized fractions among new neurons were comparable between control and mutant mice (Fig. 7I). Given that *Olig2* is not expressed in either *Dcx*<sup>+</sup> immature neurons in the SVZ or mature neurons in the OB, it is unlikely that the selective loss of CR<sup>+</sup> neurons in the mutant OB results from the defective survival of CR<sup>+</sup> neurons. Rather, these results support the idea that *Olig2* expression in NSCs is selectively required for the specification of CR<sup>+</sup> neurons in the GL.

## DISCUSSION

### Olig2 reveals molecular heterogeneity of adult NSCs

Our data showed that *Olig2*-expressing NSCs reside widely along the DV and ML axes of the postnatal SVZ, but that they are most enriched in the ventral subdomain of the SVZ (Fig. 1). Importantly, this ventrally biased distribution pattern of *Olig2*<sup>+</sup> cells is largely complementary to that of dorsally enriched *Gsx2*-expressing cells in the adult SVZ (López-Juárez et al., 2013). Moreover, *Olig2*<sup>+</sup> and *Gsx2*<sup>+</sup> NSCs were mostly mutually exclusive (Fig. 1). scRNA-seq data also demonstrated that, when combined, *Olig2*<sup>+</sup> and *Gsx2*<sup>+</sup> cells comprised 46% of all aNSCs/TAPs in the adult SVZ and 59% at P14, demonstrating that they are major NSC subtypes in the postnatal brain (Fig. 2). The homeodomain TFs *Gsx1* and *Nkx2.1*, and the zinc finger TF *Zic1*, are also expressed in a subset of NSCs in the vSVZ and mSVZ, respectively (López-Juárez et al., 2013; Merkle et al., 2014; Paul et al., 2017). However, our data showed that inactivation of *Olig2* does not significantly change the expression of these TFs in the vSVZ. Thus, the relationships of these NSCs with *Olig2*<sup>+</sup> and *Gsx2*<sup>+</sup> NSCs are currently unknown and remain to be further investigated.

### Crosstalk between *Olig2* and *Gsx2* in embryonic and adult NSCs

The region-selective expression of *Olig2* and *Gsx2* defines a similar topological organization of NSC/progenitor domains in embryos and adults. Nevertheless, we found a clear difference in the relationship between *Olig2* and *Gsx2* in embryonic and adult NSCs. In embryos, genetic inactivation of *Olig2* led to a marked ventral expansion of the *Gsx2*-high region, whereas inactivation of *Gsx2* resulted in expansion of the dorsal limit of *Olig2* expression (Fig. 6). Thus, the border between *Gsx2*-high and *Olig2*<sup>+</sup> domains is established and/or maintained by cross-repression during embryogenesis. By contrast, conditional inactivation of *Olig2* and *Gsx2* in adult NSCs did not significantly alter the expression of the other gene (this study and López-Juárez et al., 2013). It could be that, once the mutually exclusive expression patterns of *Olig2* and *Gsx2* are established during embryogenesis, their expression is subsequently maintained independently by certain cell-autonomous mechanisms in the postnatal brain.

### Role of *Olig2*-expressing NSCs in OB interneuron diversity and neurogenesis

Our results demonstrated that *Olig2*<sup>+</sup> adult NSCs contribute to the generation of both CR<sup>+</sup> and TH<sup>+</sup> neurons in the GL, which are mutually exclusive and the predominant neuronal subtypes among adult-born GL neurons (Lemasson et al., 2005; Kohwi et al., 2007; Batista-Brito et al., 2008; Sakamoto et al., 2014). Our data showed that *Olig2*<sup>+</sup> NSCs were present in all SVZ subdomains, although they were most enriched in the vSVZ. Thus, it is possible that *Olig2*<sup>+</sup> NSCs are heterogeneous and that those in distinct subdomains may be responsible for the generation of distinct neuronal subtypes. Interestingly, it has been proposed that CR<sup>+</sup>, TH<sup>+</sup> and CB<sup>+</sup> GL neurons derive predominantly from anterior/medial, carousal/

dorsal, and ventral subpopulations of NSCs, respectively (Merkle et al., 2007, 2014). However, experimental data reported in these studies indicate that the correlation between these neuronal subtypes and the topological locations of NSCs is not a strict match but reflects an overall trend only. In fact, the current study, together with our previous report (López-Juárez et al., 2013), demonstrates that both *Olig2*<sup>+</sup> and *Gsx2*<sup>+</sup> NSCs generate CR<sup>+</sup> neurons in the GL despite the fact that they are mutually exclusive stem cell pools in the postnatal SVZ. Moreover, although *Olig2*<sup>+</sup> NSCs are abundant in the vSVZ, our fate-mapping study did not detect the generation of CB<sup>+</sup> GL neurons by these ventral *Olig2*<sup>+</sup> NSCs. Thus, not all NSCs in the vSVZ are responsible for the generation of CB<sup>+</sup> neurons. As such, the notion that particular subtypes of OB neurons marked by existing markers are generated solely by a specific group of NSCs that exist in particular SVZ subdomains only is not supported by available data and certainly an oversimplification. Rather, our study and existing data support the idea that neurons expressing the same known molecular markers are likely to be produced by heterogeneous NSC populations that may exist in multiple SVZ subdomains.

### Developmental changes in the molecular properties of *Olig2*-expressing NSCs/progenitors

Similarities and differences between NSCs/progenitors in the developing and adult brain have been extensively studied (Fuentealba et al., 2015; Götz et al., 2016). However, a difficulty in such comparisons is that NSCs/progenitors are highly heterogeneous in different regions of the embryonic and postnatal brains, and such heterogeneity changes over time. scRNA-seq analysis of *Olig2*<sup>+</sup> NSCs/progenitors at different stages provides us with a unique opportunity to compare equivalent NSC populations at distinct stages at the molecular level. We found that, although *Olig2*<sup>+</sup> NSCs/progenitors at each developmental stage intrinsically comprise heterogeneous cell populations, cells belonging to each stage as a whole form a unique cell cluster compared with cells at other developmental stages (Fig. 5). Our analysis further revealed that changes in cell cycle and metabolic/signaling pathways contribute significantly to such stepwise developmental transitions. For example, the fraction of cells in the G0/G1 phase markedly increased from 7% to 35% between E12.5 and E18.5 and was further elevated at the P14 (41%) and adult (72%) stages. Such stepwise increases in cells in the G0/G1 phase were accompanied by gradual decreases of cells in both the S and G2/M phases. Molecular pathway analysis also revealed that the activity of the signaling pathways for NTF receptors was initially low at E12.5 but gradually increased from E18.5 to the adult stage, whereas a group of lipid metabolism and neurotransmission/ion transport-related pathways did not become active until NSCs reached the adult stage. Further investigations of these scRNA-seq datasets will help us to better understand the molecular mechanisms underlying the developmental transitions of NSCs/progenitors from early embryonic to adult stages.

## MATERIALS AND METHODS

### Animals

All animal procedures were performed according to the guidelines of the National Institute of Health and the Institutional Animal Care and Use Committee. Embryos were collected at E12.5, E15.5 and E18.5 (the day on which the copulatory plug was found was considered to be E0.5). Brains of P14 and P16 pups and adult animals from both females and males at the age of 10–12 weeks were collected after cardiac perfusion with 4% (v/v) paraformaldehyde (PFA) in PBS. Details of the mouse lines and their handling are described in the supplementary Materials and Methods.

## Histology

Cryosections (12  $\mu\text{m}$ ) of embryos and vibratome sections (30  $\mu\text{m}$ ) of postnatal and adult brains were used for immunostaining. The method used to identify specific subdomains of the SVZ and the antibodies used for immunostaining are described in the supplementary Materials and Methods. Fluorescent images were captured using a Nikon AIR si laser scanning confocal microscope. Quantitative results are expressed as the mean  $\pm$  standard deviation (s.d.) of data obtained from three to four animals for each genotype. All statistical analyses were performed using R software (version R 3.5.0: <https://www.r-project.org/>) (for details, see the supplementary Materials and Methods).

## scRNA-seq

scRNA-seq data on E12.5 ventral telencephalon have been described previously (GSE42768: Roychoudhury et al., 2020), and the other three datasets on E18.5, P14 and adult cells generated in this study are available from GEO under the accession number GSE174392. Details of the generation and analysis of scRNA-seq data are described in the supplementary Materials and Methods.

## Acknowledgements

We are grateful to Magdalena Götz, Jane Johnson, Hirohide Takebayashi and Kazuaki Yoshikawa for reagents, and to Matthew Kofron, Evan Meyer, Sarah McLeod, Diane Girard, Jordan Burge and Amber Niederhelman for technical support.

## Competing interests

The authors declare no competing or financial interests.

## Author contributions

Conceptualization: Á.d.Á., M.A., M.N.; Methodology: Á.d.Á., M.A., S.S.P., M.N.; Software: M.A., N.S., S.S.P.; Validation: M.N.; Formal analysis: Á.d.Á., M.A., N.S., S.S.P., M.N.; Investigation: Á.d.Á., M.A., M.N.; Resources: K.U., S.Q., J.E., D.N., J.S., B.G., Q.R.L., S.S.P., R.W., K.C., M.N.; Data curation: Á.d.Á., M.A., K.U., N.S., S.Q., J.E., D.N., J.S., S.S.P., R.W., K.C., M.N.; Writing - original draft: Á.d.Á., M.N.; Writing - review & editing: Á.d.Á., M.A., N.S., S.Q., J.E., D.N., J.S., B.G., Q.R.L., S.S.P., R.W., K.C., M.N.; Visualization: M.A., M.N.; Supervision: M.N.; Project administration: M.N.; Funding acquisition: M.N.

## Funding

This study was supported by the National Institutes of Health (2R01NS069893 to M.N. and K.C.), by the Ohio Eminent Scholar Fund from the State of Ohio to M.N. and by a Chan Zuckerberg Initiative grant (2017-173968) to S.S.P. Deposited in PMC for release after 12 months.

## Data availability

scRNA-seq data on E18.5, P14 and adult cells generated in this study are available from GEO under the accession number GSE174392.

## Peer review history

The peer review history is available online at <https://journals.biologists.com/dev/article-lookup/doi/10.1242/dev.200028>.

## References

- Andersen, J., Urbán, N., Achimastou, A., Ito, A., Simic, M., Ullom, K., Martynoga, B., Lebel, M., Göritz, C., Frisén, J. et al. (2014). A transcriptional mechanism integrating inputs from extracellular signals to activate hippocampal stem cells. *Neuron* **83**, 1085-1097. doi:10.1016/j.neuron.2014.08.004
- Batista-Brito, R., Close, J., Machold, R. and Fishell, G. (2008). The distinct temporal origins of olfactory bulb interneuron subtypes. *J. Neurosci.* **28**, 3966-3975. doi:10.1523/JNEUROSCI.5625-07.2008
- Becht, E., McInnes, L., Healy, J., Dutertre, C.-A., Kwok, I. W. H., Ng, L. G., Ginhoux, F. and Newell, E. W. (2018). Dimensionality reduction for visualizing single-cell data using UMAP. *Nat. Biotechnol.* **37**, 38-44. doi:10.1038/nbt.4314
- Brill, M. S., Snapyan, M., Wohlfrom, H., Ninkovic, J., Jawerka, M., Mastick, G. S., Ashery-Padan, R., Saghatelian, A., Berninger, B. and Götz, M. (2008). A *dlx2*- and *pax6*-dependent transcriptional code for periglomerular neuron specification in the adult olfactory bulb. *J. Neurosci.* **28**, 6439-6452. doi:10.1523/JNEUROSCI.0700-08.2008
- Briñón, J. G., Martínez-Guijarro, F. J., Bravo, I. G., Arevalo, R., Crespo, C., Okazaki, K., Hidaka, H., Aijón, J. and Alonso, J. R. (1999). Coexpression of neurocalcin with other calcium-binding proteins in the rat main olfactory bulb. *J. Comp. Neurol.* **407**, 404-414. doi:10.1002/(SICI)1096-9861(19990510)407:3<404::AID-CNE8>3.0.CO;2-9
- Cai, J., Chen, Y., Cai, W.-H., Hurlock, E. C., Wu, H., Kernie, S. G., Parada, L. F. and Lu, Q. R. (2007). A crucial role for Olig2 in white matter astrocyte development. *Development* **134**, 1887-1899. doi:10.1242/dev.02847
- Casarsa, S., Fode, C. and Guillemot, F. (1999). Mash1 regulates neurogenesis in the ventral telencephalon. *Development* **126**, 525-534. doi:10.1242/dev.126.3.525
- Cebrian-Silla, A., Nascimento, M. A., Redmond, S. A., Mansky, B., Wu, D., Obner, K., Rodriguez, R. R., Gonzalez-Granero, S., Garcia-Verdugo, J. M., Lim, D. A. et al. (2021). Single-cell analysis of the ventricular-subventricular zone reveals signatures of dorsal and ventral adult neurogenesis. *eLife* **10**, e67436. doi:10.7554/eLife.67436.sa2
- Chapman, H., Waclaw, R. R., Pei, Z., Nakafuku, M. and Campbell, K. (2013). The homeobox gene *Gsx2* controls the timing of oligodendroglial fate specification in mouse lateral ganglionic eminence progenitors. *Development* **140**, 2289-2298. doi:10.1242/dev.091090
- Chapman, H., Riesenberger, A., Ehrman, L. A., Kohli, V., Nardini, D., Nakafuku, M., Campbell, K. and Waclaw, R. R. (2018). *Gsx* transcription factors control neuronal versus glial specification in ventricular zone progenitors of the mouse lateral ganglionic eminence. *Dev. Biol.* **442**, 115-126. doi:10.1016/j.ydbio.2018.07.005
- Coré, N., Erni, A., Hoffmann, H. M., Mellon, P. L., Saurin, A. J., Beclin, C. and Cremer, H. (2020). Stem cell regionalization during olfactory bulb neurogenesis depends on regulatory interactions between *Vax1* and *Pax6*. *eLife* **9**, e58215. doi:10.7554/eLife.58215
- de Chevigny, A., Coré, N., Follert, P., Gaudin, M., Barbry, P., Béclin, C. and Cremer, H. (2012). miR-7a regulation of *Pax6* controls spatial origin of forebrain dopaminergic neurons. *Nat. Neurosci.* **15**, 1120-1126. doi:10.1038/nn.3142
- Delgado, R. N. and Lim, D. A. (2015). Embryonic *Nkx2.1*-expressing neural precursor cells contribute to the regional heterogeneity of adult V-SVZ neural stem cells. *Dev. Biol.* **407**, 265-274. doi:10.1016/j.ydbio.2015.09.008
- Dessaud, E., Yang, L. L., Hill, K., Cox, B., Ulloa, F., Ribeiro, A., Mynett, A., Novitsch, B. G. and Briscoe, J. (2007). Interpretation of the sonic hedgehog morphogen gradient by a temporal adaptation mechanism. *Nature* **450**, 717-720. doi:10.1038/nature06347
- Doetsch, F., Petreanu, L., Caille, I., Garcia-Verdugo, J.-M. and Alvarez-Buylla, A. (2002). EGF converts transit-amplifying neurogenic precursors in the adult brain into multipotent stem cells. *Neuron* **36**, 1021-1034. doi:10.1016/S0896-6273(02)01133-9
- Dulken, B. W., Leeman, D. S., Boutet, S. C., Hebestreit, K. and Brunet, A. (2017). Single-cell transcriptomic analysis defines heterogeneity and transcriptional dynamics in the adult neural stem cell lineage. *Cell Rep.* **18**, 777-790. doi:10.1016/j.celrep.2016.12.060
- Emery, B. and Lu, Q. R. (2015). Transcriptional and epigenetic regulation of oligodendrocyte development and myelination in the central nervous system. *Cold Spring Harb. Perspect. Biol.* **7**, a020461. doi:10.1101/cshperspect.a020461
- Fish, J. L., Dehay, C., Kennedy, H. and Huttner, W. B. (2008). Making bigger brains-the evolution of neural-progenitor-cell division. *J. Cell Sci.* **121**, 2783-2793. doi:10.1242/jcs.023465
- Fuentealba, L. C., Rompani, S. B., Parraguez, J. I., Obner, K., Romero, R., Cepko, C. L. and Alvarez-Buylla, A. (2015). Embryonic origin of postnatal neural stem cells. *Cell* **161**, 1644-1655. doi:10.1016/j.cell.2015.05.041
- Götz, M., Nakafuku, M. and Petrik, D. (2016). Neurogenesis in the developing and adult brain-similarities and key differences. *Cold Spring Harb. Perspect. Biol.* **8**, a018853. doi:10.1101/cshperspect.a018853
- Griss, J., Viteri, G., Sidiropoulos, K., Nguyen, V., Fabregat, A. and Hermjakob, H. (2020). ReactomeGSA - efficient multi-omics comparative pathway analysis. *Mol. Cell. Proteomics* **19**, 2115-2125. doi:10.1074/mcp.TIR120.002155
- Hack, M. A., Saghatelian, A., de Chevigny, A., Pfeifer, A., Ashery-Padan, R., Lledo, P.-M. and Götz, M. (2005). Neuronal fate determinants of adult olfactory bulb neurogenesis. *Nat. Neurosci.* **8**, 865-872. doi:10.1038/nn1479
- Hänzelmann, S., Castelo, R. and Guinney, J. (2013). GSEA: gene set variation analysis for microarray and RNA-seq data. *BMC Bioinformatics* **14**, 7. doi:10.1186/1471-2105-14-7
- Haubensak, W., Attardo, A., Denk, W. and Huttner, W. B. (2004). Neurons arise in the basal neuroepithelium of the early mammalian telencephalon: a major site of neurogenesis. *Proc. Natl. Acad. Sci. USA* **101**, 3196-3201. doi:10.1073/pnas.0308600100
- Kohwi, M., Osumi, N., Rubenstein, J. L. R. and Alvarez-Buylla, A. (2005). *Pax6* is required for making specific subpopulations of granule and periglomerular neurons in the olfactory bulb. *J. Neurosci.* **25**, 6997-7003. doi:10.1523/JNEUROSCI.1435-05.2005
- Kohwi, M., Petryniak, M. A., Long, J. E., Ekker, M., Obata, K., Yanagawa, Y., Rubenstein, J. L. R. and Alvarez-Buylla, A. (2007). A subpopulation of olfactory bulb GABAergic interneurons is derived from *Emx1*- and *Dlx5/6*-expressing progenitors. *J. Neurosci.* **27**, 6878-6891. doi:10.1523/JNEUROSCI.0254-07.2007
- Lemasson, M., Saghatelian, A., Olivo-Marin, J.-C. and Lledo, P.-M. (2005). Neonatal and adult neurogenesis provide two distinct populations of newborn neurons to the mouse olfactory bulb. *J. Neurosci.* **25**, 6816-6825. doi:10.1523/JNEUROSCI.1114-05.2005

- Lledo, P.-M. and Valley, M. (2016). Adult olfactory bulb neurogenesis. *Cold Spring Harb. Perspect. Biol.* **8**, a018945. doi:10.1101/cshperspect.a018945
- Long, J. E., Garel, S., Alvarez-Dolado, M., Yoshikawa, K., Osumi, N., Alvarez-Buylla, A. and Rubenstein, J. L. R. (2007). Dlx-dependent and -independent regulation of olfactory bulb interneuron differentiation. *J. Neurosci.* **27**, 3230-3243. doi:10.1523/JNEUROSCI.5265-06.2007
- López-Juárez, A., Howard, J., Ullom, K., Howard, L., Grande, A., Pardo, A., Waclaw, R., Sun, Y.-Y., Yang, D., Kuan, C.-Y. et al. (2013). Gsx2 controls region-specific activation of neural stem cells and injury-induced neurogenesis in the adult subventricular zone. *Genes Dev.* **27**, 1272-1287. doi:10.1101/gad.217539.113
- Lyons, G. E., Micales, B. K., Schwarz, J., Martin, J. F. and Olson, E. N. (1995). Expression of mef2 genes in the mouse central nervous system suggests a role in neuronal maturation. *J. Neurosci.* **15**, 5727-5738. doi:10.1523/JNEUROSCI.15-08-05727.1995
- Madisen, L., Zwingman, T. A., Sunkin, S. M., Oh, S. W., Zariwala, H. A., Gu, H., Ng, L. L., Palmiter, R. D., Hawrylycz, M. J., Jones, A. R. et al. (2010). A robust and high-throughput Cre reporting and characterization system for the whole mouse brain. *Nat. Neurosci.* **13**, 133-140. doi:10.1038/nn.2467
- Menn, B., Garcia-Verdugo, J. M., Yaschine, C., Gonzalez-Perez, O., Rowitch, D. and Alvarez-Buylla, A. (2006). Origin of oligodendrocytes in the subventricular zone of the adult brain. *J. Neurosci.* **26**, 7907-7918. doi:10.1523/JNEUROSCI.1299-06.2006
- Merkle, F. T., Mirzadeh, Z. and Alvarez-Buylla, A. (2007). Mosaic organization of neural stem cells in the adult brain. *Science* **317**, 381-384. doi:10.1126/science.1144914
- Merkle, F. T., Fuentealba, L. C., Sanders, T. A., Magno, L., Kessar, N. and Alvarez-Buylla, A. (2014). Adult neural stem cells in distinct microdomains generate previously unknown interneuron types. *Nat. Neurosci.* **17**, 207-214. doi:10.1038/nn.3610
- Miyoshi, G., Butt, S. J. B., Takebayashi, H. and Fishell, G. (2007). Physiologically distinct temporal cohorts of cortical interneurons arise from telencephalic Olig2-expressing precursors. *J. Neurosci.* **27**, 7786-7798. doi:10.1523/JNEUROSCI.1807-07.2007
- Mizrak, D., Levitin, H. M., Delgado, A. C., Crotet, V., Yuan, J., Chaker, Z., Silva-Vargas, V., Sims, P. A. and Doetsch, F. (2019). Single-cell analysis of regional differences in adult v-svz neural stem cell lineages. *Cell Rep.* **26**, 394-406.e5. doi:10.1016/j.celrep.2018.12.044
- Mori, T., Tanaka, K., Buffo, A., Wurst, W., Kühn, R. and Götz, M. (2006). Inducible gene deletion in astroglia and radial glia—a valuable tool for functional and lineage analysis. *Glia* **54**, 21-34. doi:10.1002/glia.20350
- Nakafuku, M. and del Águila, Á. (2020). Developmental dynamics of neurogenesis and gliogenesis in the postnatal mammalian brain in health and disease: Historical and future perspectives. *Wiley Interdiscip. Rev. Dev. Biol.* **9**, e369. doi:10.1002/wdev.369
- Nakafuku, M. and Grande, A. W. (2020). Neurogenesis in the damaged mammalian brain. In *Patterning and cell type specification in the developing CNS and PNS*, 2nd edn. (ed. J. L. R. Rubenstein and P. Rakic), pp. 523-597. Academic Press.
- Noctor, S. C., Martínez-Cerdeño, V., Ivic, L. and Kriegstein, A. R. (2004). Cortical neurons arise in symmetric and asymmetric division zones and migrate through specific phases. *Nat. Neurosci.* **7**, 136-144. doi:10.1038/nn1172
- Ono, K., Takebayashi, H., Ikeda, K., Furusho, M., Nishizawa, T., Watanabe, K. and Ikenaka, K. (2008). Regional- and temporal-dependent changes in the differentiation of Olig2 progenitors in the forebrain, and the impact on astrocyte development in the dorsal pallium. *Dev. Biol.* **320**, 456-468. doi:10.1016/j.ydbio.2008.06.001
- Ortega, F., Gascón, S., Masserdotti, G., Deshpande, A., Simon, C., Fischer, J., Dimou, L., Chichung Lie, D., Schroeder, T. and Berninger, B. (2013). Oligodendroglial and neurogenic adult subependymal zone neural stem cells constitute distinct lineages and exhibit differential responsiveness to Wnt signalling. *Nat. Cell Biol.* **15**, 602-613. doi:10.1038/ncb2736
- Parrish-Aungst, S., Shipley, M. T., Erdelyi, F., Szabo, G. and Puche, A. C. (2007). Quantitative analysis of neuronal diversity in the mouse olfactory bulb. *J. Comp. Neurol.* **501**, 825-836. doi:10.1002/cne.21205
- Pastrana, E., Cheng, L.-C. and Doetsch, F. (2009). Simultaneous prospective purification of adult subventricular zone neural stem cells and their progeny. *Proc. Natl. Acad. Sci. USA* **106**, 6387-6392. doi:10.1073/pnas.0810407106
- Paul, A., Chaker, Z. and Doetsch, F. (2017). Hypothalamic regulation of regionally distinct adult neural stem cells and neurogenesis. *Science* **356**, 1383-1386. doi:10.1126/science.aal3839
- Petryniak, M. A., Potter, G. B., Rowitch, D. H. and Rubenstein, J. L. R. (2007). Dlx1 and Dlx2 control neuronal versus oligodendroglial cell fate acquisition in the developing forebrain. *Neuron* **55**, 417-433. doi:10.1016/j.neuron.2007.06.036
- Qin, S., Ware, S. M., Waclaw, R. R. and Campbell, K. (2017). Septal contributions to olfactory bulb interneuron diversity in the embryonic mouse telencephalon: role of the homeobox gene Gsx2. *Neural Dev.* **12**, 13. doi:10.1186/s13064-017-0090-5
- Roychoudhury, K., Salomone, J., Qin, S., Cain, B., Adam, M., Potter, S. S., Nakafuku, M., Gebelein, B. and Campbell, K. (2020). Physical interactions between Gsx2 and Ascl1 balance progenitor expansion versus neurogenesis in the mouse lateral ganglionic eminence. *Development* **147**, dev185348. doi:10.1242/dev.185348
- Sakamoto, M., Ieki, N., Miyoshi, G., Mochimaru, D., Miyachi, H., Imura, T., Yamaguchi, M., Fishell, G., Mori, K., Kageyama, R. et al. (2014). Continuous postnatal neurogenesis contributes to formation of the olfactory bulb neural circuits and flexible olfactory associative learning. *J. Neurosci.* **34**, 5788-5799. doi:10.1523/JNEUROSCI.0674-14.2014
- Shibata, M., Nakao, H., Kiyonari, H., Abe, T. and Aizawa, S. (2011). MicroRNA-9 regulates neurogenesis in mouse telencephalon by targeting multiple transcription factors. *J. Neurosci.* **31**, 3407-3422. doi:10.1523/JNEUROSCI.5085-10.2011
- Stenman, J., Toresson, H. and Campbell, K. (2003). Identification of two distinct progenitor populations in the lateral ganglionic eminence: implications for striatal and olfactory bulb neurogenesis. *J. Neurosci.* **23**, 167-174. doi:10.1523/JNEUROSCI.23-01-00167.2003
- Takebayashi, H., Nabeshima, Y., Yoshida, S., Chisaka, O., Ikenaka, K. and Nabeshima, Y.-I. (2002). The basic helix-loop-helix factor olig2 is essential for the development of motoneuron and oligodendrocyte lineages. *Curr. Biol.* **12**, 1157-1163. doi:10.1016/S0960-9822(02)00926-0
- Toresson, H. and Campbell, K. (2001). A role for Gsh1 in the developing striatum and olfactory bulb of Gsh2 mutant mice. *Development* **128**, 4769-4780. doi:10.1242/dev.128.23.4769
- Toresson, H., Potter, S. S. and Campbell, K. (2000). Genetic control of dorsal-ventral identity in the telencephalon: opposing roles for Pax6 and Gsh2. *Development* **127**, 4361-4371. doi:10.1242/dev.127.20.4361
- Torii, M., Matsuzaki, F., Osumi, N., Kaibuchi, K., Nakamura, S., Casarosa, S., Guillemot, F. and Nakafuku, M. (1999). Transcription factors Mash1 and Prox-1 delineate early steps in differentiation of neural stem cells in the developing central nervous system. *Development* **126**, 443-456. doi:10.1242/dev.126.3.443
- Waclaw, R. R., Wang, B., Pei, Z., Ehrman, L. A. and Campbell, K. (2009). Distinct temporal requirements for the homeobox gene Gsx2 in specifying striatal and olfactory bulb neuronal fates. *Neuron* **63**, 451-465. doi:10.1016/j.neuron.2009.07.015
- Wang, B., Waclaw, R. R., Allen, Z. J., II, Guillemot, F. and Campbell, K. (2009). Ascl1 is a required downstream effector of Gsx gene function in the embryonic mouse telencephalon. *Neural Dev.* **4**, 5. doi:10.1186/1749-8104-4-5
- Wang, B., Long, J. E., Flandin, P., Pla, R., Waclaw, R. R., Campbell, K. and Rubenstein, J. L. R. (2013). Loss of Gsx1 and Gsx2 function rescues distinct phenotypes in Dlx1/2 mutants. *Comp. Neurol.* **521**, 1561-1584. doi:10.1002/cne.23242
- Wang, H., Xu, L., Lai, C., Hou, K., Chen, J., Guo, Y., Sambangi, A., Swaminathan, S., Xie, C., Wu, Z. et al. (2021). Region-specific distribution of Olig2-expressing astrocytes in adult mouse brain and spinal cord. *Mol. Brain* **14**, 36. doi:10.1186/s13041-021-00747-0
- Wilsch-Bräuninger, M., Florio, M. and Huttner, W. B. (2016). Neocortex expansion in development and evolution - from cell biology to single genes. *Curr. Opin. Neurobiol.* **39**, 122-132. doi:10.1016/j.conb.2016.05.004
- Xie, X. P., Laks, D. R., Sun, D., Poran, A., Laughney, A. M., Wang, Z., Sam, J., Belenguer, G., Fariñas, I., Elemento, O. et al. (2020). High-resolution mouse subventricular zone stem-cell niche transcriptome reveals features of lineage, anatomy, and aging. *Proc. Natl. Acad. Sci. USA* **117**, 31448-31458. doi:10.1073/pnas.2014389117
- Young, K. M., Fogarty, M., Kessar, N. and Richardson, W. D. (2007). Subventricular zone stem cells are heterogeneous with respect to their embryonic origins and neurogenic fates in the adult olfactory bulb. *J. Neurosci.* **27**, 8286-8296. doi:10.1523/JNEUROSCI.0476-07.2007
- Yue, T., Xian, K., Hurlock, E., Xin, M., Kernie, S. G., Parada, L. F. and Lu, Q. R. (2006). A critical role for dorsal progenitors in cortical myelination. *J. Neurosci.* **26**, 1275-1280. doi:10.1523/JNEUROSCI.4717-05.2006
- Yun, K., Potter, S. and Rubenstein, J. L. (2001). Gsh2 and Pax6 play complementary roles in dorsoventral patterning of the mammalian telencephalon. *Development* **128**, 193-205. doi:10.1242/dev.128.2.193
- Yun, K., Fischman, S., Johnson, J., de Angelis, M. H., Weinmaster, G. and Rubenstein, J. L. R. (2002). Modulation of the notch signaling by Mash1 and Dlx1/2 regulates sequential specification and differentiation of progenitor cell types in the subcortical telencephalon. *Development* **129**, 5029-5040. doi:10.1242/dev.129.21.5029
- Yun, K., Garel, S., Fischman, S. and Rubenstein, J. L. R. (2003). Patterning of the lateral ganglionic eminence by the Gsh1 and Gsh2 homeobox genes regulates striatal and olfactory bulb histogenesis and the growth of axons through the basal ganglia. *J. Comp. Neurol.* **461**, 151-165. doi:10.1002/cne.10685
- Yuzwa, S. A., Borrett, M. J., Innes, B. T., Voronova, A., Ketela, T., Kaplan, D. R., Bader, G. B. and Miller, F. D. (2017). Developmental emergence of adult neural stem cells as revealed by single-cell transcriptional profiling. *Cell Rep.* **21**, 3970-3986. doi:10.1016/j.celrep.2017.12.017
- Zywitz, V., Misios, A., Bunatyan, L., Willnow, T. E. and Rajewsky, N. (2018). Single-cell transcriptomics characterizes cell types in the subventricular zone and uncovers molecular defects impairing adult neurogenesis. *Cell Rep.* **25**, 2457-2469.e8. doi:10.1016/j.celrep.2018.11.003
